# Supplementary material for: Direct oxidative coupling of thiols and benzylic ethers via C(sp3)–H activation and C–O cleavage to lead thioesters
Source: Royal Society of Chemistry journal article supplement (doi:10.1039/c4ob02250e), 2014-11-19

**Supporting information for**  
**Direct oxidative coupling of thiols and benzylic ethers *via***  
**C(sp<sup>3</sup>)-H activation and C-O cleavage to lead thioesters**

Jie Feng<sup>a</sup>, Guoping Lu<sup>a</sup>, Meifang Lv<sup>a</sup> and Chun Cai<sup>a\*</sup>

<sup>a</sup> Chemical Engineering College, Nanjing University of Science & Technology, Nanjing, Jiangsu 210094, P. R. China

\* Corresponding Author E-mail: [c.cai@mail.njust.edu.cn](mailto:c.cai@mail.njust.edu.cn)

|                                       |          |
|---------------------------------------|----------|
| <b>1. Experimental</b>                | <b>2</b> |
| <b>2. Characterization Data</b>       | <b>2</b> |
| <b>3. NMR Spectra of All Products</b> | <b>8</b> |

## 1 Experimental

### 1.1 General

All commercial materials were used without further purification. DTBP used is of 100% purity. Special attention is needed when using DTBP as it is flammable. All known compounds are identified by appropriate technique such as  $^1\text{H}$  NMR,  $^{13}\text{C}$  NMR and compared with previously reported data. All unknown compounds are characterized by  $^1\text{H}$  NMR,  $^{13}\text{C}$  NMR, MS and elemental analyses. Analytical thin-layer chromatography are performed on glass plates precoated with silica gel impregnated with a fluorescent indicator (254 nm), and the plates are visualized by exposure to ultraviolet light. GC-MS analyses were performed on an Agilent 7890A-5975C instrument (Column: DB-5 MS). Mass spectra are taken on a Finnigan TSQ Quantum - MS instrument in the electrospray ionization (ESI) mode.  $^1\text{H}$  NMR and  $^{13}\text{C}$  NMR spectra are recorded on an AVANCE 500 Bruker spectrometer operating at 500 MHz and 125 MHz in  $\text{CDCl}_3$ , respectively, and chemical shifts are reported in ppm. Elemental analyses are performed on a Yanagimoto MT3CHN recorder. GC analyses are performed on an Agilent 7890A instrument (Column: Agilent 19091J-413: 30 m  $\times$  320  $\mu\text{m}$   $\times$  0.25  $\mu\text{m}$ , carrier gas:  $\text{H}_2$ , FID detection).

### 1.2 Experimental Procedure

#### *General procedure for synthesis of thioesters*

A 5 ml vial sealed tube was charged with thiols or thiophenol (1.3 mmol), benzylic ether (1 mmol) and DTBP (3 mmol) which was stirred at 120  $^\circ\text{C}$  for 24 h. Upon completion, the reaction mixture was then cooled, extracted with ethyl acetate, and dried over anhydrous  $\text{Na}_2\text{SO}_4$ . After filtration, the organic solutions were concentrated and the residue was purified by column chromatography on silica gel to give the pure product (hexane/ethyl acetate=20/1).

#### *The synthesis of S-(2-((tert-butoxycarbonyl)amino)ethyl) benzothioate **3u***

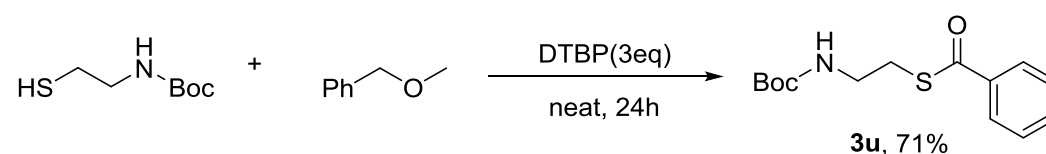

A mixture of tert-butyl (2-mercaptoethyl)carbamate (1.3 mmol), benzyl methyl ether (1 mmol) and DTBP (3 mmol) was stirred at 120  $^\circ\text{C}$  for 24 h. Upon completion, the reaction mixture was then cooled, extracted with ethyl acetate, washed with water (3  $\times$  10 mL), and dried over anhydrous  $\text{Na}_2\text{SO}_4$ . After filtration, the organic solutions were concentrated and the residue was purified by column chromatography on silica gel to give the pure product (hexane/ethyl acetate=20/1) **3u** (200 mg, 71%).

#### *The synthesis of S-(2-((2,2,2-trifluoroacetyl)-1H-imidazol-4-yl)ethyl) benzothioate **3v***

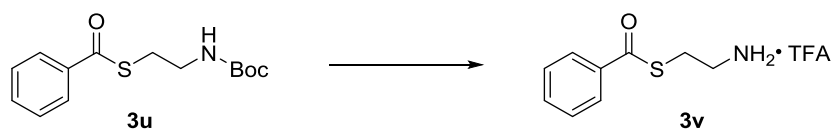

Compounds **3v** (1.0 mmol) was added of dry trifluoroacetic acid (TFA) (2 mL) at 0 °C. The solution was stirred at room temperature for 16 h and then evaporated to dryness. Crystallization of the residue from hexanes-EtOAc afforded pure **3v** as a light brown solid (0.283 g, 96%).

## 2. Characterization Data

All the products were known compounds,  $^1\text{H}$  NMR,  $^{13}\text{C}$  NMR,  $^{19}\text{F}$  NMR and MS datas were given as below.

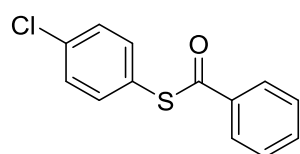

Chemical Formula:  $\text{C}_{13}\text{H}_9\text{ClOS}$   
Exact Mass: 248.01  
Elemental Analysis: C, 62.78; H, 3.65; Cl, 14.25; O, 6.43; S, 12.89

*S*-(4-chlorophenyl) benzothioate **3a**.  $^1\text{H}$  NMR (500 MHz,  $\text{CDCl}_3$ )  $\delta$  8.03 (d,  $J = 7.8$  Hz, 2H), 7.64 (t,  $J = 7.4$  Hz, 1H), 7.52 (t,  $J = 7.6$  Hz, 2H), 7.46 (s, 4H).  $^{13}\text{C}$  NMR (125 MHz,  $\text{CDCl}_3$ ) 188.7, 135.3, 135.0, 132.9, 128.5, 127.8, 126.5, 124.9. MS (ESI)  $m/z$ : 248.

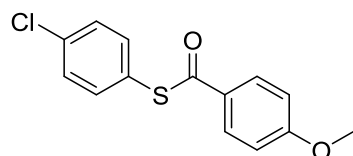

Chemical Formula:  $\text{C}_{14}\text{H}_{11}\text{ClO}_2\text{S}$   
Exact Mass: 278.02  
Elemental Analysis: C, 60.32; H, 3.98; Cl, 12.72; O, 11.48; S, 11.50

*S*-(4-chlorophenyl) 4-methoxybenzothioate **3b**.  $^1\text{H}$  NMR (500 MHz,  $\text{CDCl}_3$ )  $\delta$  8.01 (d,  $J = 8.5$  Hz, 2H), 7.53 – 7.36 (m, 4H), 6.97 (d,  $J = 8.5$  Hz, 2H), 3.89 (s, 3H).  $^{13}\text{C}$  NMR (126 MHz,  $\text{CDCl}_3$ )  $\delta$  187.03, 163.18, 135.43, 134.81, 128.79, 128.43, 128.11, 125.21, 113.02, 76.36, 76.11, 75.85, 54.59. MS (ESI)  $m/z$ : 278.

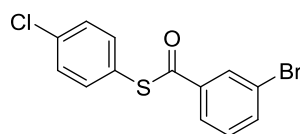

Chemical Formula:  $\text{C}_{13}\text{H}_8\text{BrClOS}$   
Exact Mass: 325.92  
Elemental Analysis: C, 47.66; H, 2.46; Br, 24.39; Cl, 10.82; O, 4.88; S, 9.79

*S*-(4-chlorophenyl) 3-bromobenzothioate **3c**.  $^1\text{H}$  NMR (500 MHz,  $\text{CDCl}_3$ )  $\delta$  8.14 (s, 1H), 7.95 (d,  $J = 7.7$  Hz, 1H), 7.75 (d,  $J = 7.9$  Hz, 1H), 7.45 (s, 5H), 7.39 (t,  $J = 7.9$  Hz, 1H).  $^{13}\text{C}$  NMR (126 MHz,  $\text{CDCl}_3$ )  $\delta$  187.44, 137.06, 135.69, 135.25, 131.38, 129.41, 128.66, 127.39, 125.07, 124.26, 122.07. MS (ESI)  $m/z$ : 326.

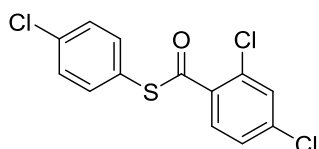

Chemical Formula: C<sub>13</sub>H<sub>7</sub>Cl<sub>3</sub>OS  
 Exact Mass: 315.93  
 Elemental Analysis: C, 49.16; H, 2.22; Cl, 33.48; O, 5.04; S, 10.09

*S*-(4-chlorophenyl) 2,4-dichlorobenzothioate **3d**. <sup>1</sup>H NMR (500 MHz, CDCl<sub>3</sub>) δ 7.74 (d, *J* = 8.3 Hz, 1H), 7.52 (s, 1H), 7.46 (s, 4H), 7.37 (d, *J* = 8.1 Hz, 1H). <sup>13</sup>C NMR (126 MHz, CDCl<sub>3</sub>) δ 187.64, 137.44, 135.42, 134.92, 134.01, 131.36, 130.03, 129.18, 128.72, 126.22, 124.50. MS (ESI) *m/z*: 316.

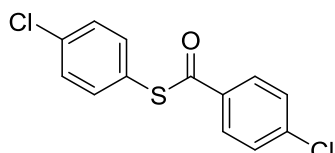

Chemical Formula: C<sub>13</sub>H<sub>8</sub>Cl<sub>2</sub>OS  
 Exact Mass: 281.97  
 Elemental Analysis: C, 55.14; H, 2.85; Cl, 25.04; O, 5.65; S, 11.32

*S*-(4-chlorophenyl) 4-chlorobenzothioate **3e**. <sup>1</sup>H NMR (500 MHz, CDCl<sub>3</sub>) δ 7.96 (d, *J* = 8.5 Hz, 2H), 7.48 (d, *J* = 8.5 Hz, 2H), 7.45 (s, 4H). <sup>13</sup>C NMR (126 MHz, CDCl<sub>3</sub>) δ 187.52, 139.34, 135.28, 133.71, 128.61, 128.39, 128.18, 127.87, 124.43. MS (ESI) *m/z*: 282.

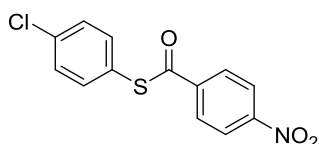

Chemical Formula: C<sub>13</sub>H<sub>8</sub>ClNO<sub>3</sub>S  
 Exact Mass: 292.99  
 Elemental Analysis: C, 53.16; H, 2.75; Cl, 12.07; N, 4.77; O, 16.34; S, 10.92

*S*-(4-chlorophenyl) 4-nitrobenzothioate **3f**. <sup>1</sup>H NMR (500 MHz, CDCl<sub>3</sub>) δ 8.35 (d, *J* = 8.7 Hz, 2H), 8.17 (d, *J* = 8.7 Hz, 2H), 7.46 (s, 4H). <sup>13</sup>C NMR (126 MHz, CDCl<sub>3</sub>) δ 187.36, 149.79, 139.98, 135.61, 135.14, 128.81, 127.55, 123.66, 123.09. MS (ESI) *m/z*: 293.

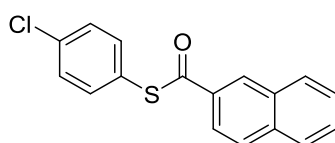

Chemical Formula: C<sub>17</sub>H<sub>11</sub>ClOS  
 Exact Mass: 298.02  
 Elemental Analysis: C, 68.34; H, 3.71; Cl, 11.86; O, 5.35; S, 10.73

*S*-(4-chlorophenyl) naphthalene-2-carbothioate **3g**. <sup>1</sup>H NMR (500 MHz, CDCl<sub>3</sub>) δ 8.54 (d, *J* = 8.3 Hz, 1H), 8.23 (d, *J* = 7.2 Hz, 1H), 8.08 (d, *J* = 8.2 Hz, 1H), 7.92 (d, *J* = 7.8 Hz, 1H), 7.71 – 7.45 (m, 7H). <sup>13</sup>C NMR (126 MHz, CDCl<sub>3</sub>) δ 190.62, 135.17, 135.05, 133.32, 132.88, 132.57, 128.59, 128.35, 127.44, 127.28, 127.15, 125.83, 124.22, 123.48. MS (ESI) *m/z*: 298.

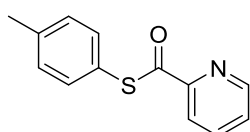

Chemical Formula: C<sub>12</sub>H<sub>8</sub>ClNOS  
 Exact Mass: 249.00  
 Elemental Analysis: C, 57.72; H, 3.23; Cl, 14.20; N, 5.61; O, 6.41; S, 12.84

*S*-(4-chlorophenyl) pyridine-2-carbothioate **3h**. <sup>1</sup>H NMR (500 MHz, CDCl<sub>3</sub>) δ 8.73

(d,  $J = 4.4$  Hz, 1H), 7.94 (d,  $J = 7.8$  Hz, 1H), 7.86 (d,  $J = 7.6$  Hz, 1H), 7.53 (dd,  $J = 6.9, 5.3$  Hz, 1H), 7.40 (d,  $J = 8.0$  Hz, 2H), 7.26 (d,  $J = 7.8$  Hz, 2H), 2.39 (s, 3H).  $^{13}\text{C}$  NMR (126 MHz,  $\text{CDCl}_3$ )  $\delta$  191.38, 150.79, 148.17, 138.67, 136.40, 133.89, 129.09, 127.08, 123.59, 119.79, 20.40. MS (ESI)  $m/z$ : 249

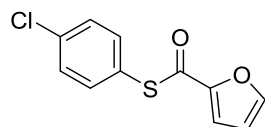

Chemical Formula:  $\text{C}_{11}\text{H}_7\text{ClO}_2\text{S}$   
 Exact Mass: 237.99  
 Elemental Analysis: C, 55.35; H, 2.96; Cl, 14.85; O, 13.41; S, 13.43

*S*-(4-chlorophenyl) furan-2-carbothioate **3i**.  $^1\text{H}$  NMR (500 MHz,  $\text{CDCl}_3$ )  $\delta$  7.65 (s, 1H), 7.44 (s, 4H), 7.28 (d,  $J = 3.1$  Hz, 1H), 6.60 (d,  $J = 1.6$  Hz, 1H).  $^{13}\text{C}$  NMR (126 MHz,  $\text{CDCl}_3$ )  $\delta$  177.15, 149.12, 145.70, 135.38, 135.16, 128.55, 123.69, 115.57, 111.56. MS (ESI)  $m/z$ : 238

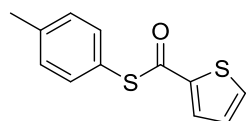

Chemical Formula:  $\text{C}_{11}\text{H}_7\text{ClOS}_2$   
 Exact Mass: 253.96  
 Elemental Analysis: C, 51.86; H, 2.77; Cl, 13.92; O, 6.28; S, 25.17

*S*-(4-chlorophenyl) thiophene-2-carbothioate **3j**.  $^1\text{H}$  NMR (500 MHz,  $\text{CDCl}_3$ )  $\delta$  7.90 (d,  $J = 3.8$  Hz, 1H), 7.66 (d,  $J = 4.9$  Hz, 1H), 7.40 (d,  $J = 8.1$  Hz, 2H), 7.26 (d,  $J = 2.5$  Hz, 2H), 7.17 – 7.12 (m, 1H), 2.40 (s, 3H).  $^{13}\text{C}$  NMR (126 MHz,  $\text{CDCl}_3$ )  $\delta$  181.50, 140.51, 138.97, 134.00, 132.04, 130.48, 129.10, 126.96, 122.39, 20.37. MS (ESI)  $m/z$ : 254.

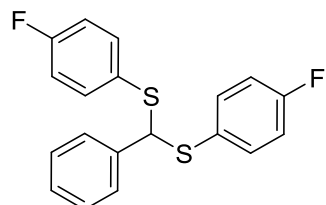

(phenylmethylene)bis((4-fluorophenyl)sulfane)  
 Chemical Formula:  $\text{C}_{19}\text{H}_{14}\text{F}_2\text{S}_2$   
 Exact Mass: 344.0  
 Elemental Analysis: C, 66.26; H, 4.10; F, 11.03; S, 18.62

(Phenylmethylene)bis((4-fluorophenyl)sulfane) **3k'**.  $^1\text{H}$  NMR (500 MHz,  $\text{CDCl}_3$ )  $\delta$  7.35 – 7.28 (m, 4H), 7.28 – 7.22 (m, 5H), 6.98 – 6.90 (m, 4H), 5.24 (s, 1H).  $^{13}\text{C}$  NMR (126 MHz,  $\text{CDCl}_3$ )  $\delta$  163.99, 162.01, 139.39, 135.95, 135.89, 129.21, 128.57, 128.26, 127.92, 116.15, 115.98, 77.38, 77.12, 76.87, 62.23.  $^{19}\text{F}$  NMR (470 MHz,  $\text{CDCl}_3$ )  $\delta$  -112.62. MS (ESI)  $m/z$ : 344.

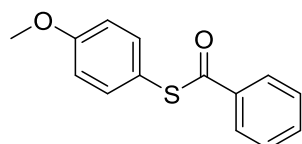

Chemical Formula:  $\text{C}_{14}\text{H}_{12}\text{O}_2\text{S}$   
 Exact Mass: 244.06  
 Elemental Analysis: C, 68.83; H, 4.95; O, 13.10; S, 13.12

*S*-(4-methoxyphenyl) benzothioate **3l**.  $^1\text{H}$  NMR (500 MHz,  $\text{CDCl}_3$ )  $\delta$  7.99 (d,  $J = 7.5$  Hz, 2H), 7.57 – 7.50 (m, 1H), 7.45 – 7.35 (m, 4H), 6.94 (d,  $J = 8.7$  Hz, 2H), 3.73 (d,  $J = 27.4$  Hz, 3H).  $^{13}\text{C}$  NMR (126 MHz,  $\text{CDCl}_3$ )  $\delta$  191.0, 160.9, 136.7, 133.7, 128.9, 127.5, 118.0, 115.1, 55.5. MS (ESI)  $m/z$ : 244

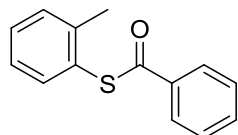

Chemical Formula: C<sub>14</sub>H<sub>12</sub>OS  
 Exact Mass: 228.06  
 Elemental Analysis: C, 73.65; H, 5.30; O, 7.01; S, 14.04

*S*-(*o*-tolyl) benzothioate **3m**. <sup>1</sup>H NMR (500 MHz, CDCl<sub>3</sub>) δ 8.06 (d, *J* = 7.4 Hz, 2H), 7.61 (d, *J* = 7.4 Hz, 1H), 7.54 -7.47 (m, 3H), 7.38 (d, *J* = 6.4 Hz, 2H), 7.30-7.24 (m, 1H), 2.41 (s, 3H). <sup>13</sup>C 188.7, 141.7, 135.8, 132.6, 129.9, 129.3, 127.8, 126.6, 125.7. MS (ESI) *m/z*: 228.

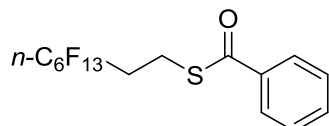

Chemical Formula: C<sub>15</sub>H<sub>9</sub>F<sub>13</sub>OS  
 Exact Mass: 484.02  
 Elemental Analysis: C, 37.20; H, 1.87; F, 51.00; O, 3.30; S, 6.62

*S*-1H,1H,2H,2H-perfluorooctyl benzothioate **3o**. <sup>1</sup>H NMR (500 MHz, CDCl<sub>3</sub>) δ 7.99-7.97 (dd, *J* = 8.0, 1.0 Hz, 2H), 7.64-7.60 (t, *J* = 7.5 Hz, 1H), 7.51-7.48 (t, *J* = 7.5 Hz, 2H), 3.33-3.30 (m, 2H), 2.57-2.47 (m, 2H). <sup>13</sup>C NMR (126 MHz, CDCl<sub>3</sub>) δ, 189.8, 135.5, 132.8, 127.8, 126.3, 30.8, 19.1. <sup>19</sup>F NMR (470 MHz, CDCl<sub>3</sub>) δ -126.2, -123.4, -122.9, -121.9, -114.5, -80.9. MS (ESI) *m/z*: 484.

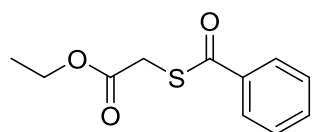

Chemical Formula: C<sub>11</sub>H<sub>12</sub>O<sub>3</sub>S  
 Exact Mass: 224.05  
 Elemental Analysis: C, 58.91; H, 5.39; O, 21.40; S, 14.30

Ethyl 2-(benzoylthio)acetate **3p**. <sup>1</sup>H NMR (500 MHz, CDCl<sub>3</sub>) δ 8.00 (d, *J* = 8.0 Hz, 2H), 7.63-7.60 (t, *J* = 7.5 Hz, 1H), 7.50-7.47 (t, *J* = 7.5 Hz, 2H), 4.27-4.23 (q, *J* = 7.0 Hz, 2H), 3.90 (s, 2H), 1.33-1.31 (t, *J* = 7.0 Hz, 3H). <sup>13</sup>C NMR (126 MHz, CDCl<sub>3</sub>) δ 189.1, 167.8, 135.2, 132.8, 127.7, 126.4, 60.9, 30.5, 13.1. MS (ESI) *m/z*: 224.

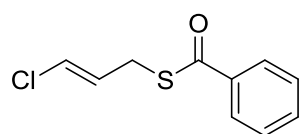

Chemical Formula: C<sub>10</sub>H<sub>9</sub>ClOS  
 Exact Mass: 212.00  
 Elemental Analysis: C, 56.47; H, 4.26; Cl, 16.67; O, 7.52; S, 15.08

(*E*)-*S*-3-chloroallyl benzothioate **3q**. <sup>1</sup>H NMR (500 MHz, CDCl<sub>3</sub>) δ 7.97 (d, *J* = 7.5 Hz, 1H), 7.62-7.59 (t, *J* = 7.5 Hz), 7.50-7.46 (t, *J* = 7.0 Hz, 2H), 6.34-6.31 (dt, *J* = 13.5, 1.0 Hz, 1H), 6.04-6.00 (dt, *J* = 13.0, 8.0 Hz, 1H), 3.75-3.73 (dd, *J* = 7.5, 1.5 Hz, 2H). <sup>13</sup>C NMR (126 MHz, CDCl<sub>3</sub>) δ 189.8, 135.7, 132.6, 127.7, 127.5, 126.3, 120.6, 28.0. MS (ESI) *m/z*: 212.

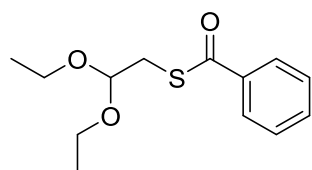

Chemical Formula: C<sub>13</sub>H<sub>18</sub>O<sub>3</sub>S  
 Exact Mass: 254.10  
 Elemental Analysis: C, 61.39; H, 7.13; O, 18.87; S, 12.60

*S*-(2,2-diethoxyethyl) benzothioate **3r**. <sup>1</sup>H NMR (500 MHz, CDCl<sub>3</sub>) δ 1.25-1.27 (t, *J* =

7.0 Hz, 6H), 3.33 (d,  $J = 5.5$  Hz, 2H), 3.61-3.65 (m, 2H), 3.72-3.78 (m, 2H), 4.62 (t,  $J = 5.5$  Hz, 1H), 7.48-7.49 (t,  $J = 7.5$  Hz, 2H), 7.58-7.61 (t,  $J = 7.5$  Hz, 1H), 8.01 (d,  $J = 7.5$  Hz, 2H).  $^{13}\text{C}$  NMR (125 MHz,  $\text{CDCl}_3$ )  $\delta$  14.2, 31.3, 81.6, 100.5, 126.3, 127.6, 128.0, 132.5, 135.9, 190.6. MS (ESI)  $m/z$ : 254.

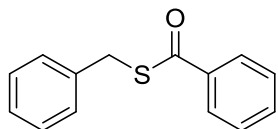

Chemical Formula:  $\text{C}_{14}\text{H}_{12}\text{OS}$

Exact Mass: 228.06

Elemental Analysis: C, 73.65; H, 5.30; O, 7.01; S, 14.04

*S*-benzyl benzothioate **3s**.  $^1\text{H}$  NMR (500 MHz,  $\text{CDCl}_3$ )  $\delta$  8.01 – 7.91 (m, 2H), 7.56 (t,  $J = 7.4$  Hz, 1H), 7.44 (t,  $J = 7.8$  Hz, 2H), 7.38 (d,  $J = 7.3$  Hz, 2H), 7.32 (t,  $J = 7.5$  Hz, 2H), 7.25 (t,  $J = 7.3$  Hz, 1H), 4.32 (s, 2H).  $^{13}\text{C}$  NMR (126 MHz,  $\text{CDCl}_3$ )  $\delta$  190.32, 136.49, 135.82, 132.46, 128.00, 127.66, 126.33, 32.36. MS (ESI)  $m/z$ : 228.

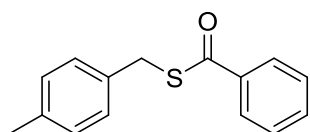

Chemical Formula:  $\text{C}_{15}\text{H}_{14}\text{OS}$

Exact Mass: 242.08

Elemental Analysis: C, 74.34; H, 5.82; O, 6.60; S, 13.23

*S*-4-methylbenzyl benzothioate **3t**.  $^1\text{H}$  NMR (500 MHz,  $\text{CDCl}_3$ )  $\delta$  8.01-7.99 (m, 2H), 7.61-7.57 (m, 1H), 7.48-7.45 (m, 2H), 7.30 (d,  $J = 8.0$  Hz, 2H), 7.15 (d,  $J = 7.5$  Hz, 2H), 4.32 (s, 2H), 2.36 (s, 3H).  $^{13}\text{C}$  NMR (126 MHz,  $\text{CDCl}_3$ )  $\delta$  190.5, 136.1, 135.9, 133.4, 132.4, 128.4, 127.9, 127.6, 126.3, 32.1, 20.2. MS (ESI)  $m/z$ : 242.

### 3. NMR Spectra of All Products

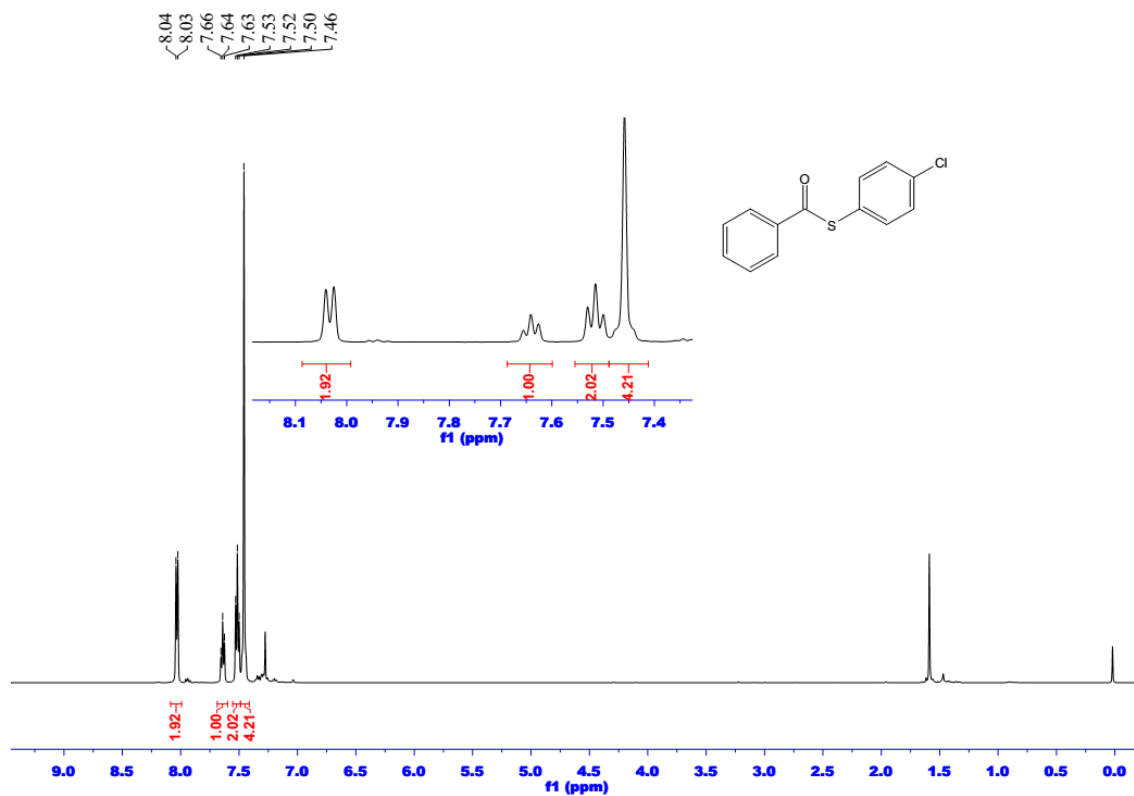

$^1\text{H}$  NMR spectrum (500 MHz,  $\text{CDCl}_3$ ) of **3a**

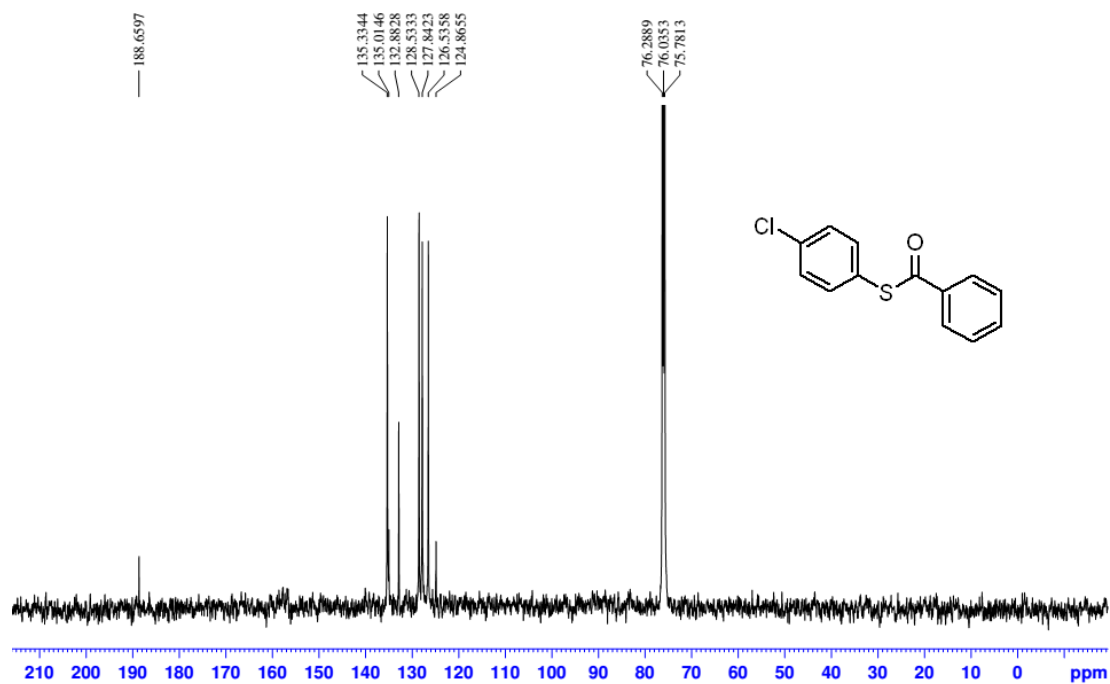

$^{13}\text{C}$  NMR spectrum (125 MHz,  $\text{CDCl}_3$ ) of **3a**



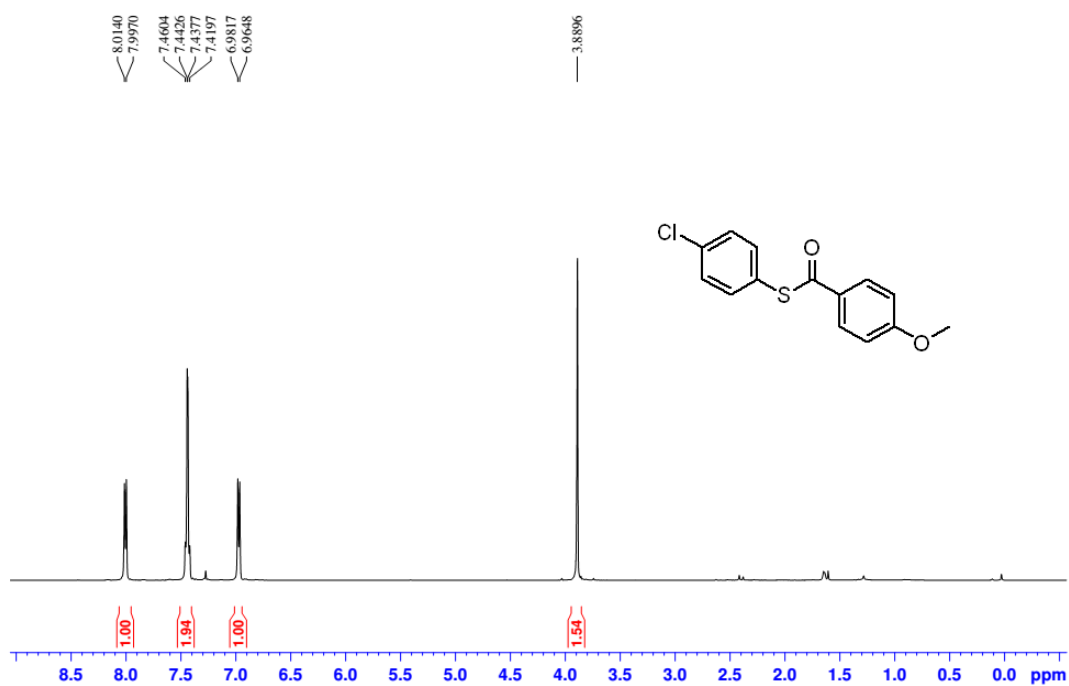

<sup>1</sup>H NMR spectrum (500 MHz, CDCl<sub>3</sub>) of **3b**

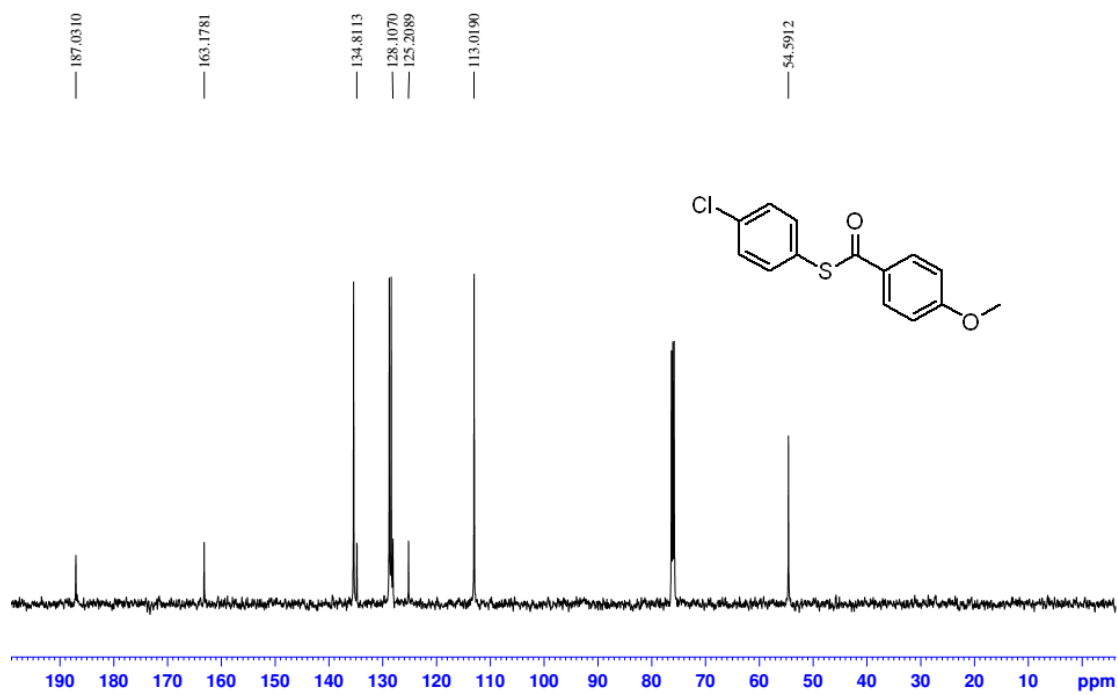

<sup>13</sup>C NMR spectrum (125 MHz, CDCl<sub>3</sub>) of **3b**

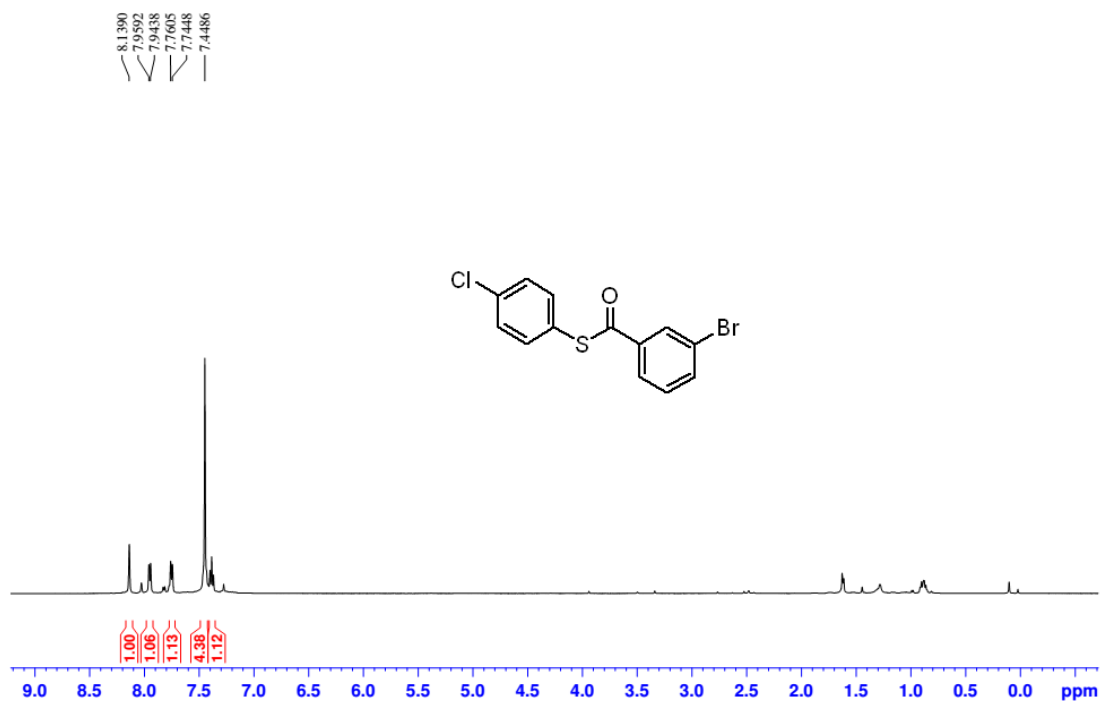

<sup>1</sup>H NMR spectrum (500 MHz, CDCl<sub>3</sub>) of **3c**

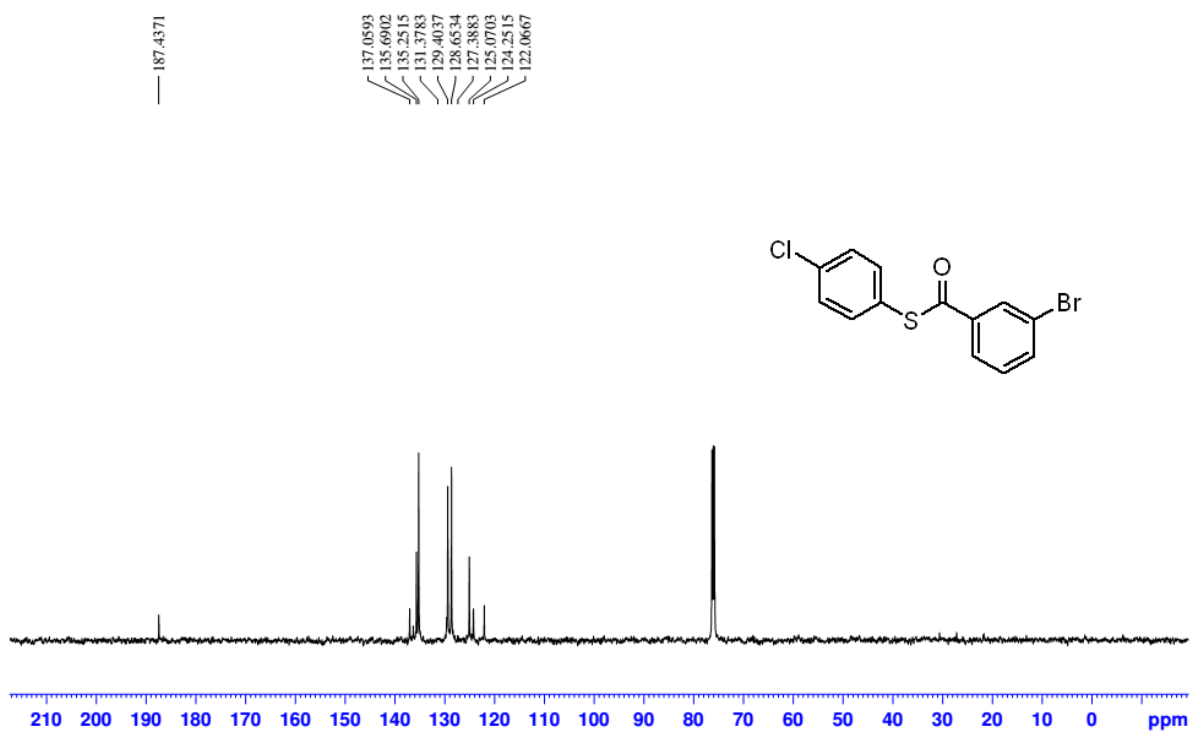

<sup>13</sup>C NMR spectrum (125 MHz, CDCl<sub>3</sub>) of **3c**

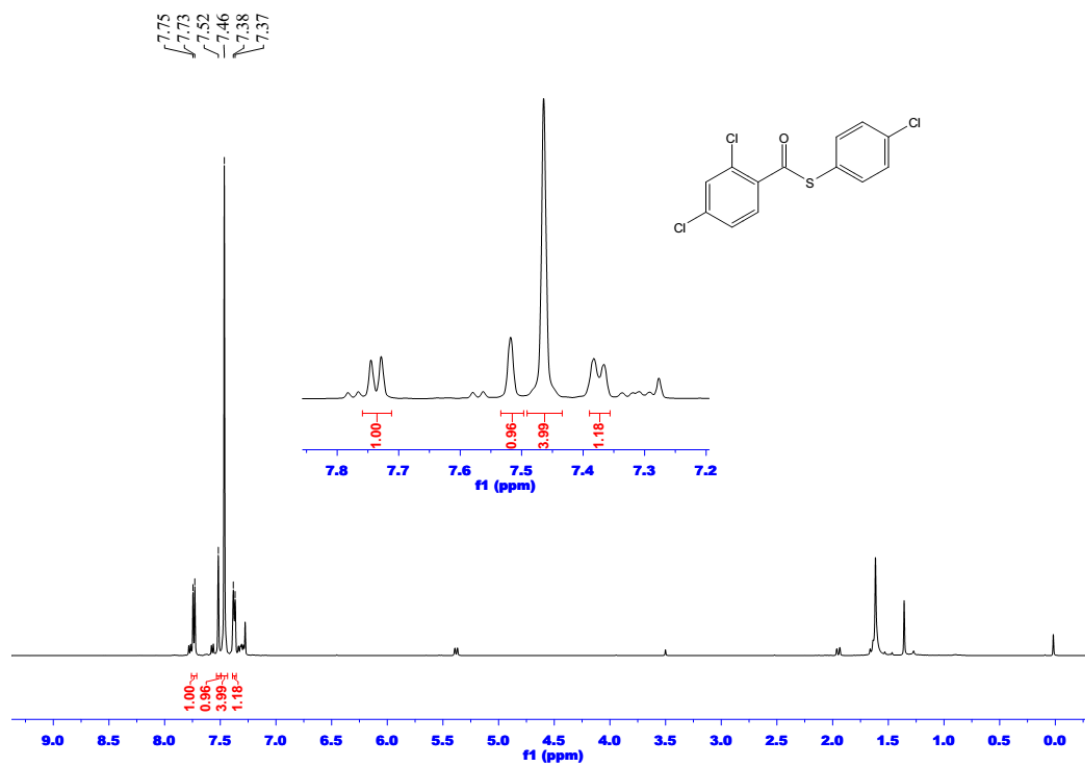

$^1\text{H}$  NMR spectrum (500 MHz,  $\text{CDCl}_3$ ) of **3d**

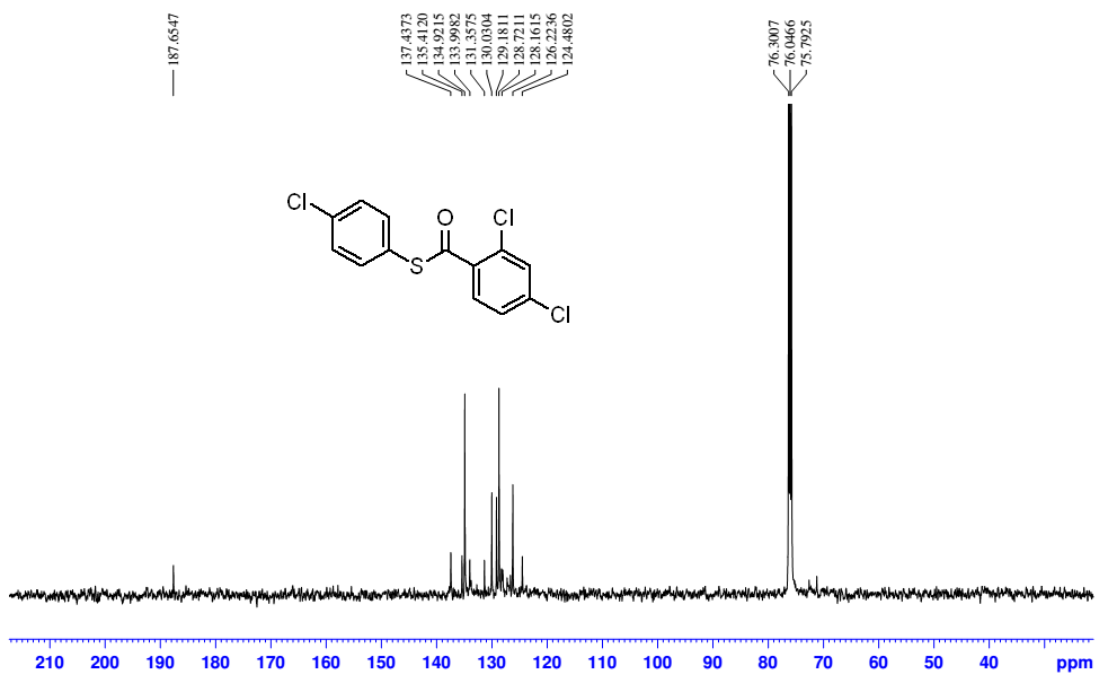

$^{13}\text{C}$  NMR spectrum (125 MHz,  $\text{CDCl}_3$ ) of **3d**

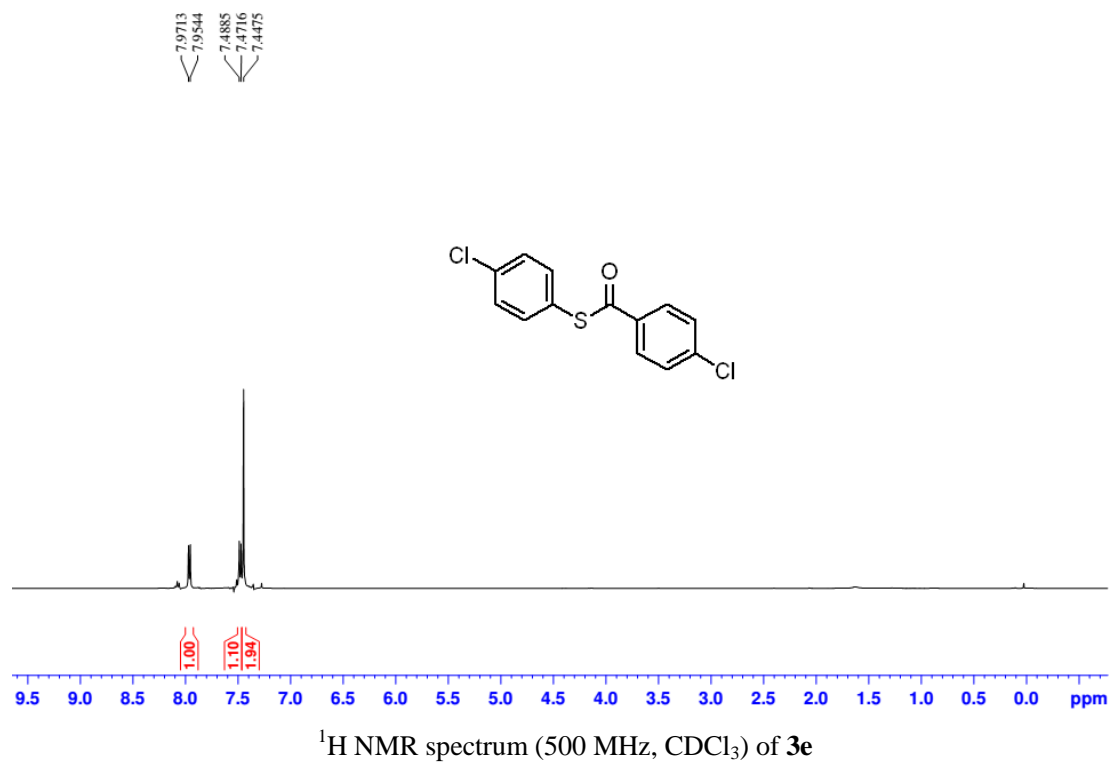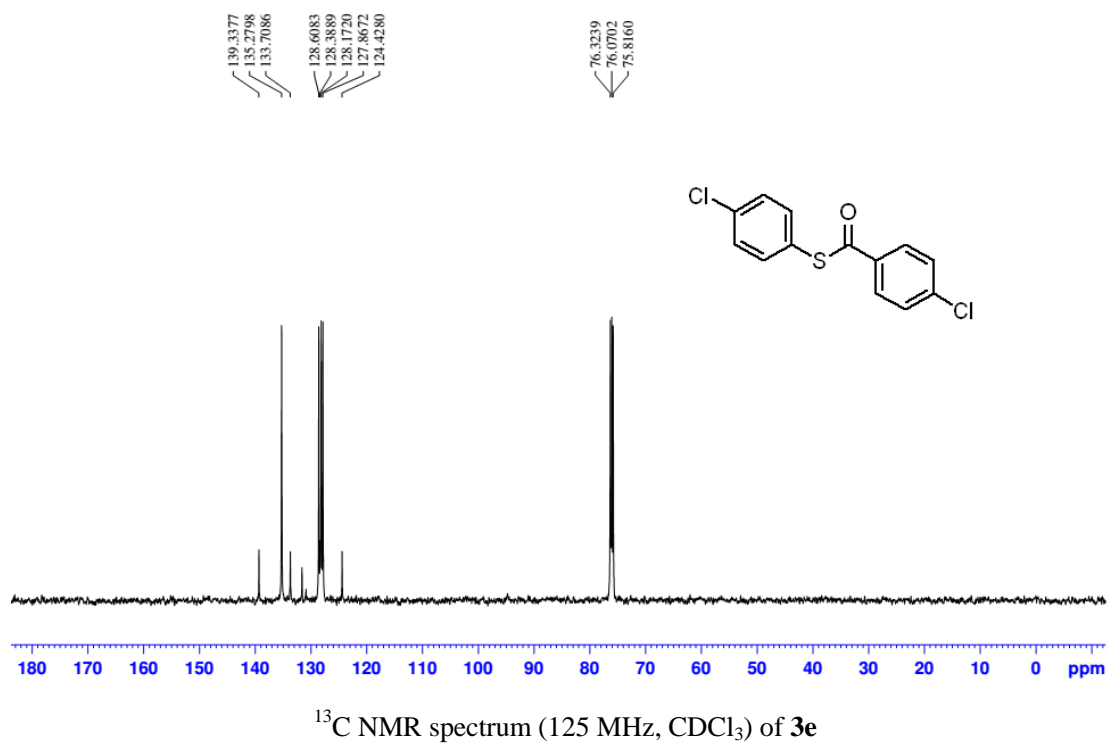

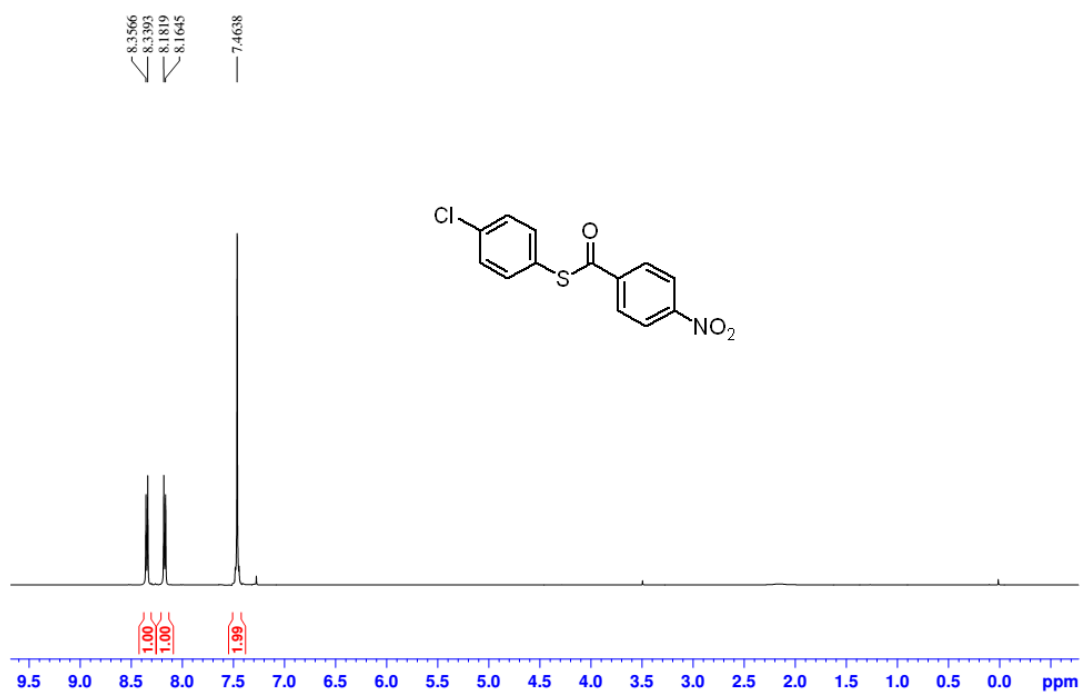

$^1\text{H}$  NMR spectrum (500 MHz,  $\text{CDCl}_3$ ) of **3f**

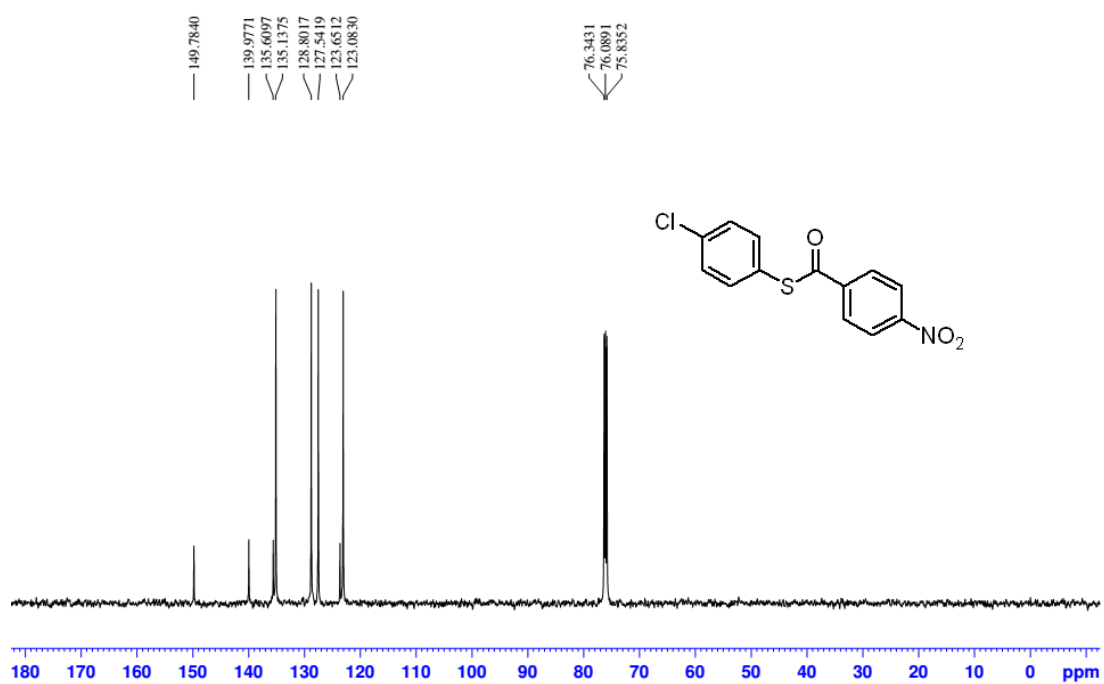

$^{13}\text{C}$  NMR spectrum (125 MHz,  $\text{CDCl}_3$ ) of **3f**

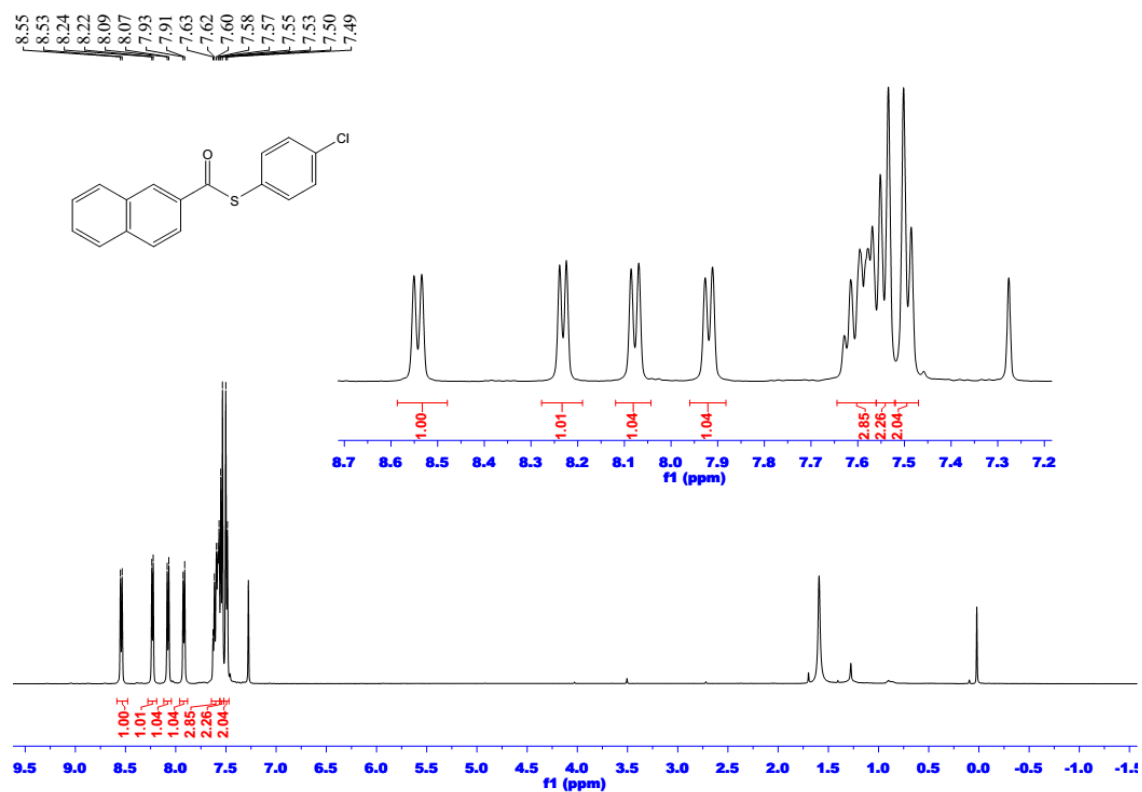

<sup>1</sup>H NMR spectrum (500 MHz, CDCl<sub>3</sub>) of **3g**

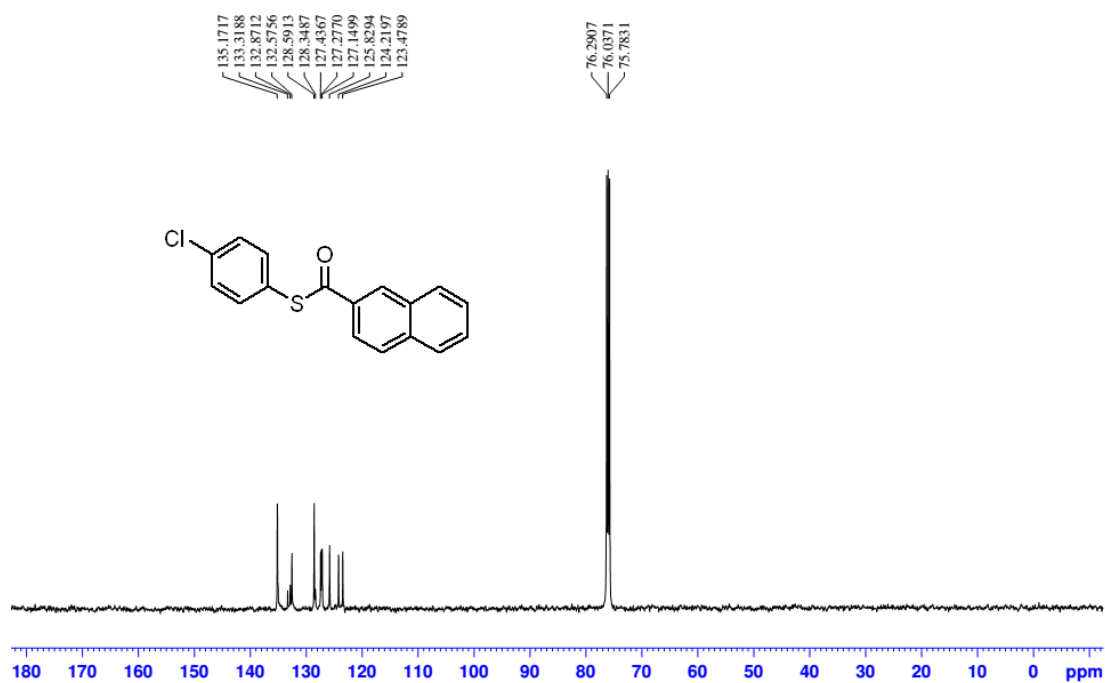

<sup>13</sup>C NMR spectrum (125 MHz, CDCl<sub>3</sub>) of **3g**

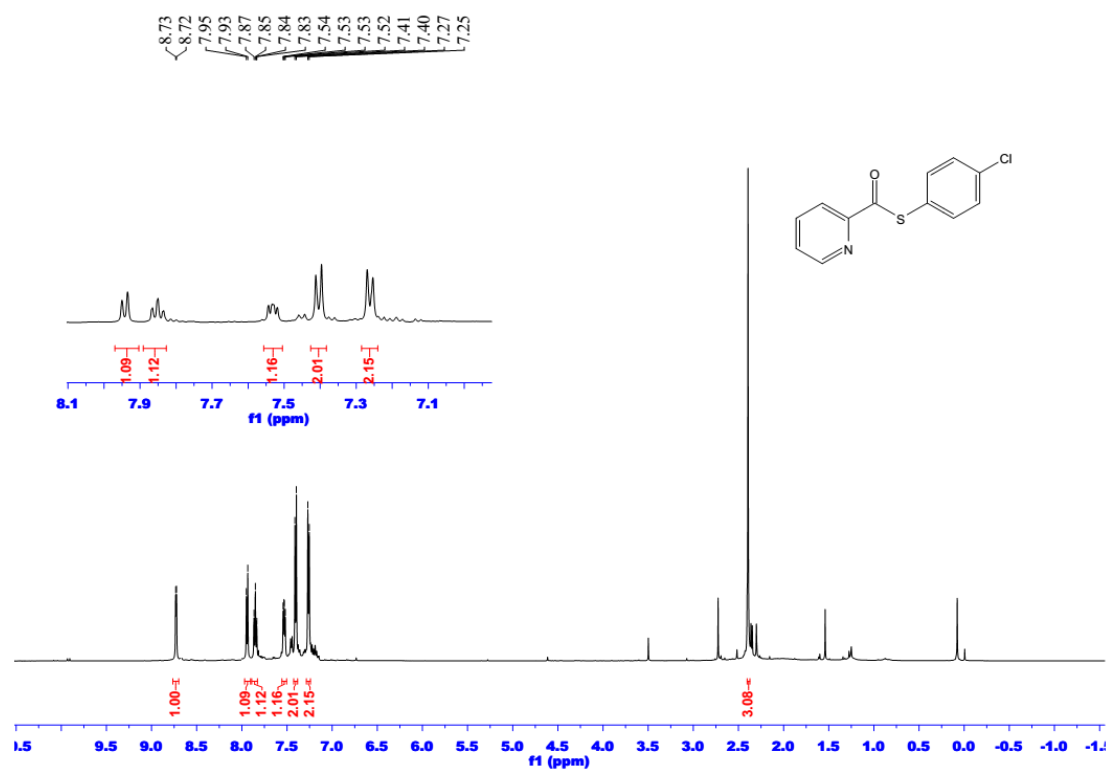

<sup>1</sup>H NMR spectrum (500 MHz, CDCl<sub>3</sub>) of **3h**

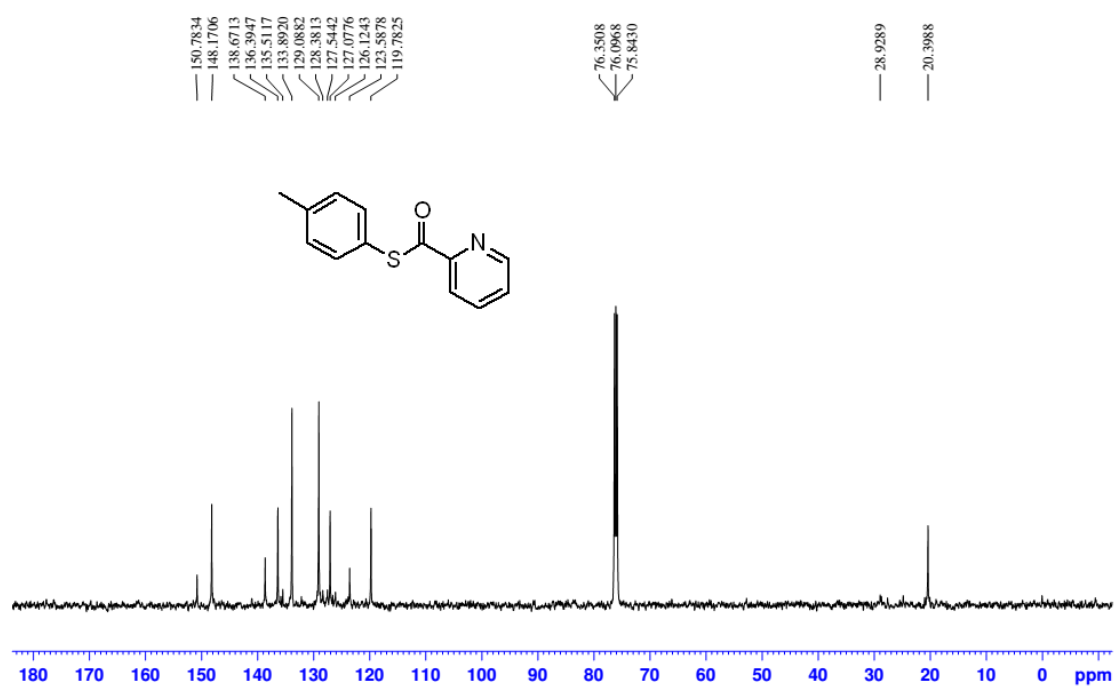

<sup>13</sup>C NMR spectrum (125 MHz, CDCl<sub>3</sub>) of **3h**

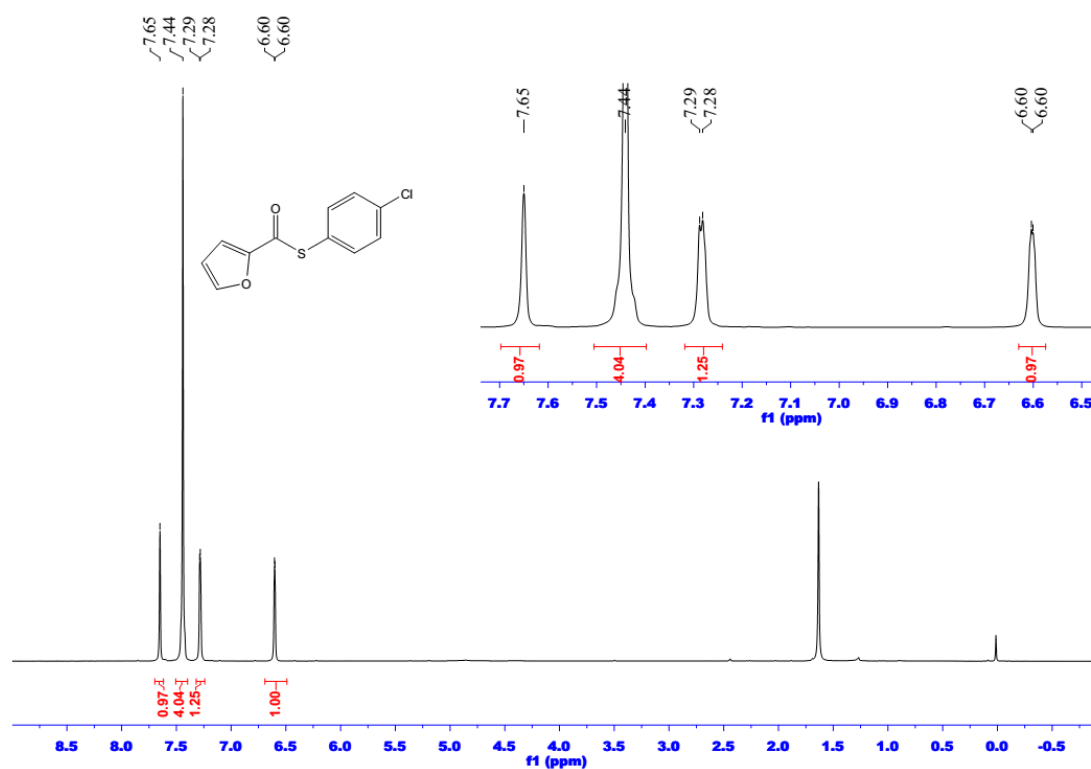

<sup>1</sup>H NMR spectrum (500 MHz, CDCl<sub>3</sub>) of **3i**

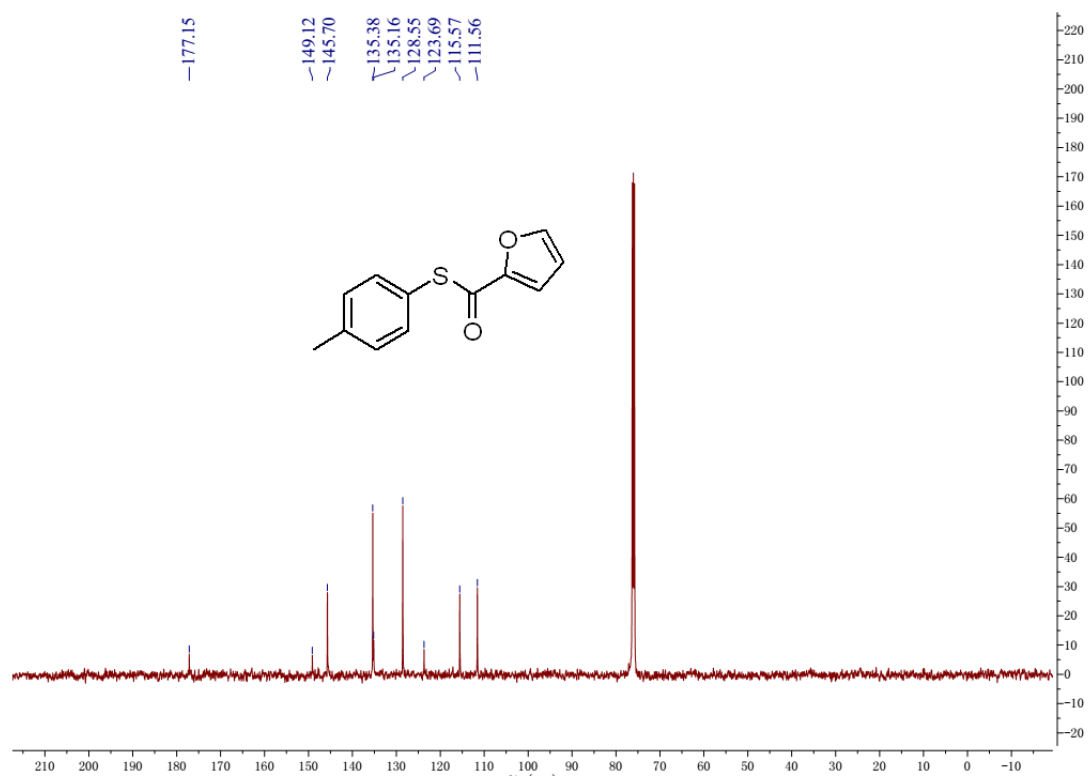

<sup>13</sup>C NMR spectrum (125 MHz, CDCl<sub>3</sub>) of **3i**



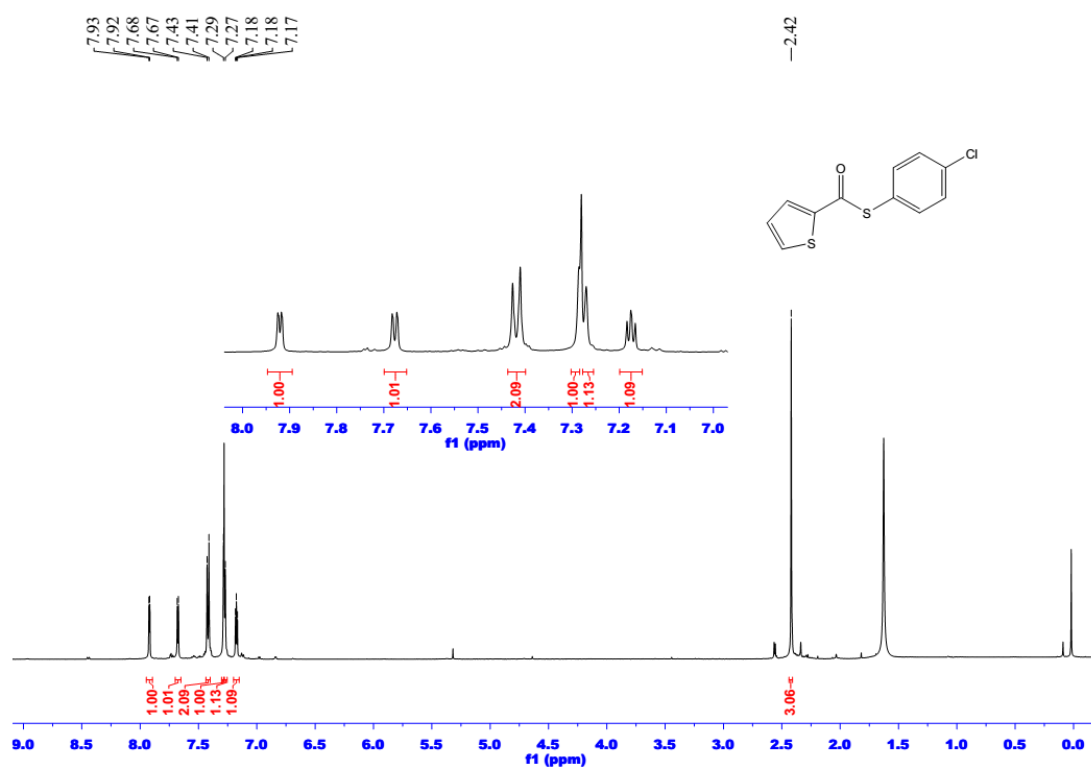

<sup>1</sup>H NMR spectrum (500 MHz, CDCl<sub>3</sub>) of **3j**

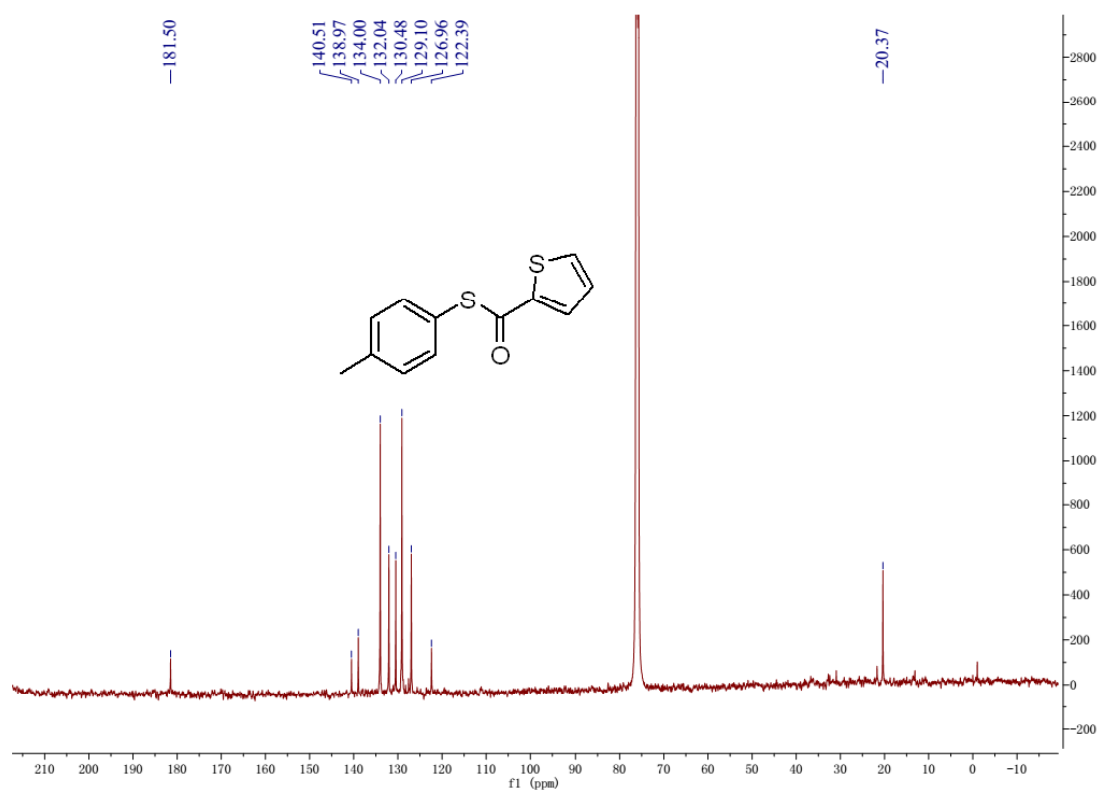

<sup>13</sup>C NMR spectrum (125 MHz, CDCl<sub>3</sub>) of **3j**

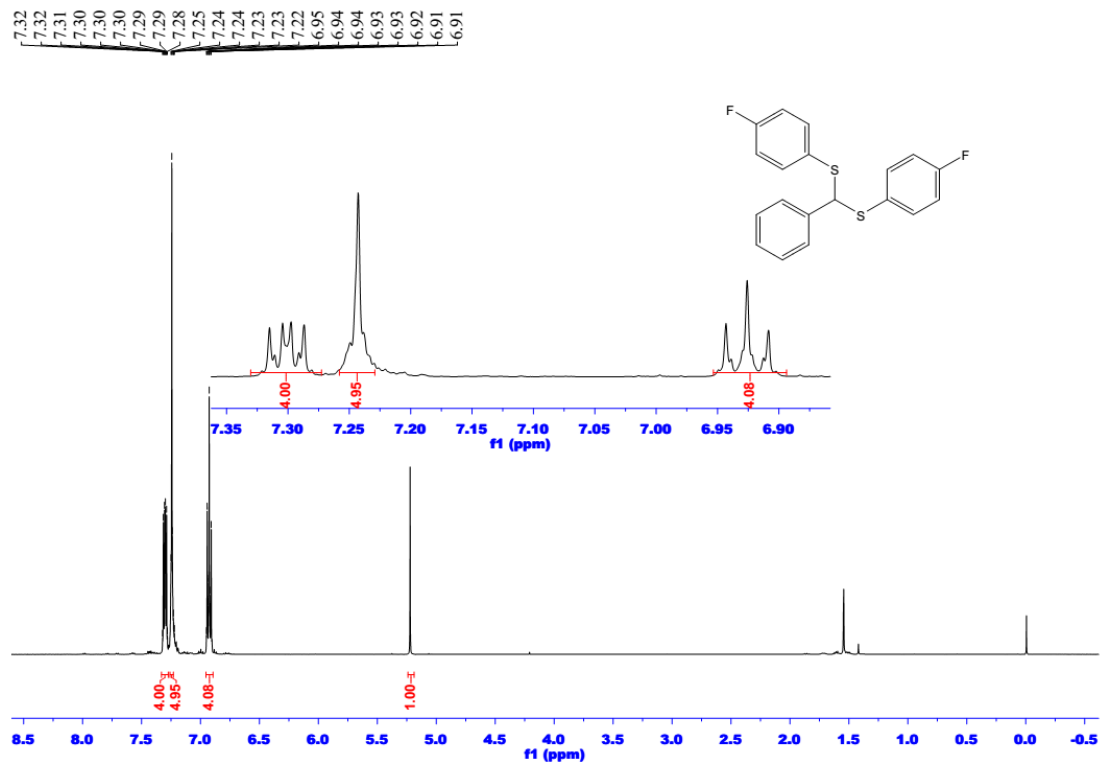

<sup>1</sup>H NMR spectrum (500 MHz, CDCl<sub>3</sub>) of **3k'**

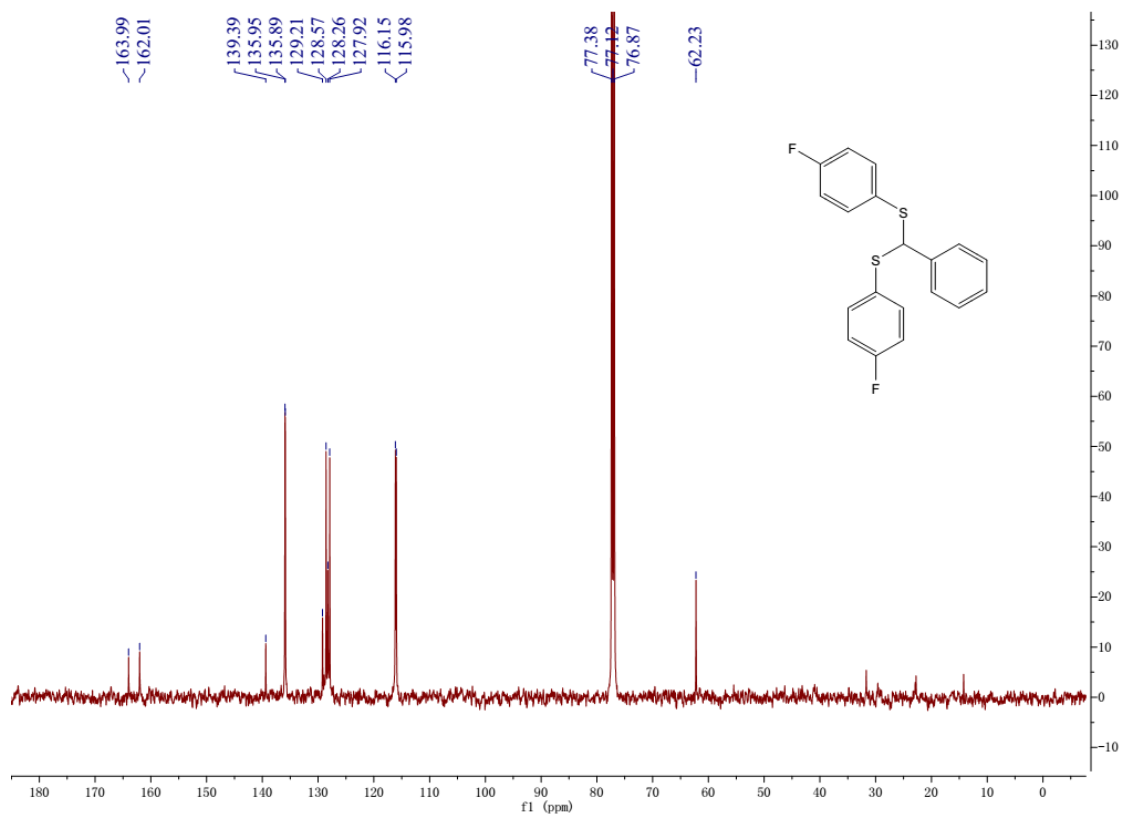

<sup>13</sup>C NMR spectrum (125 MHz, CDCl<sub>3</sub>) of **3k'**

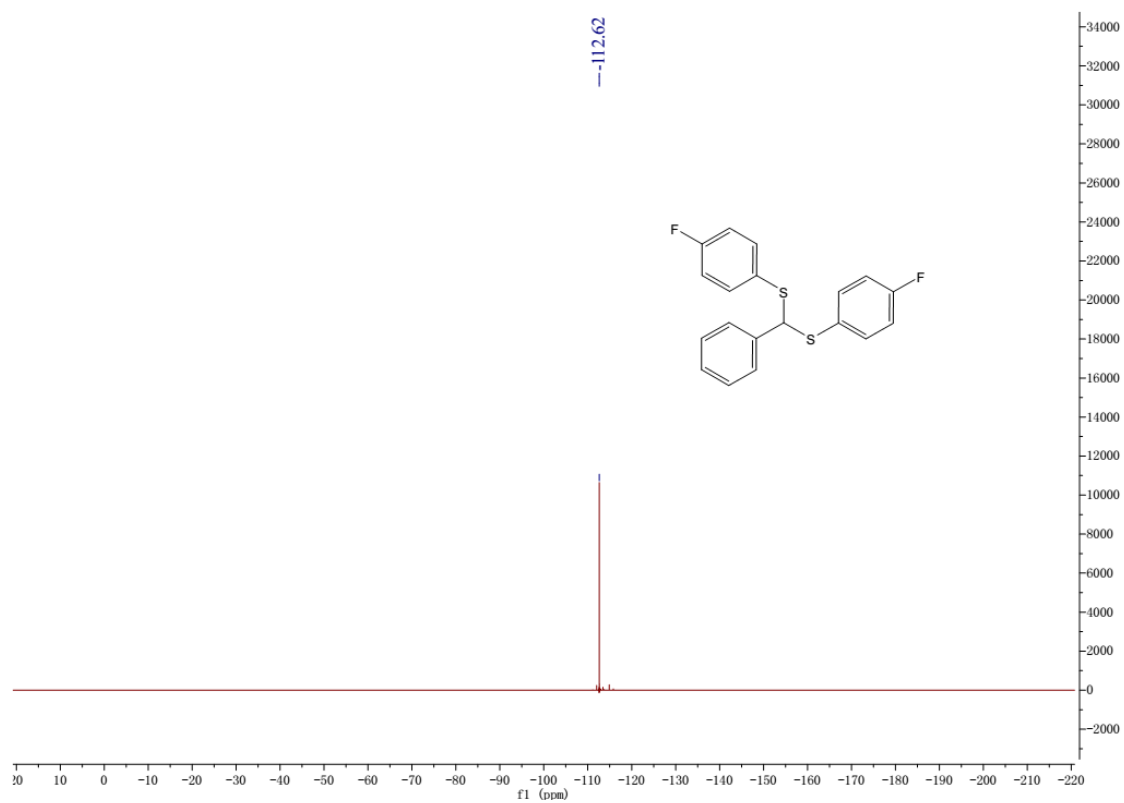

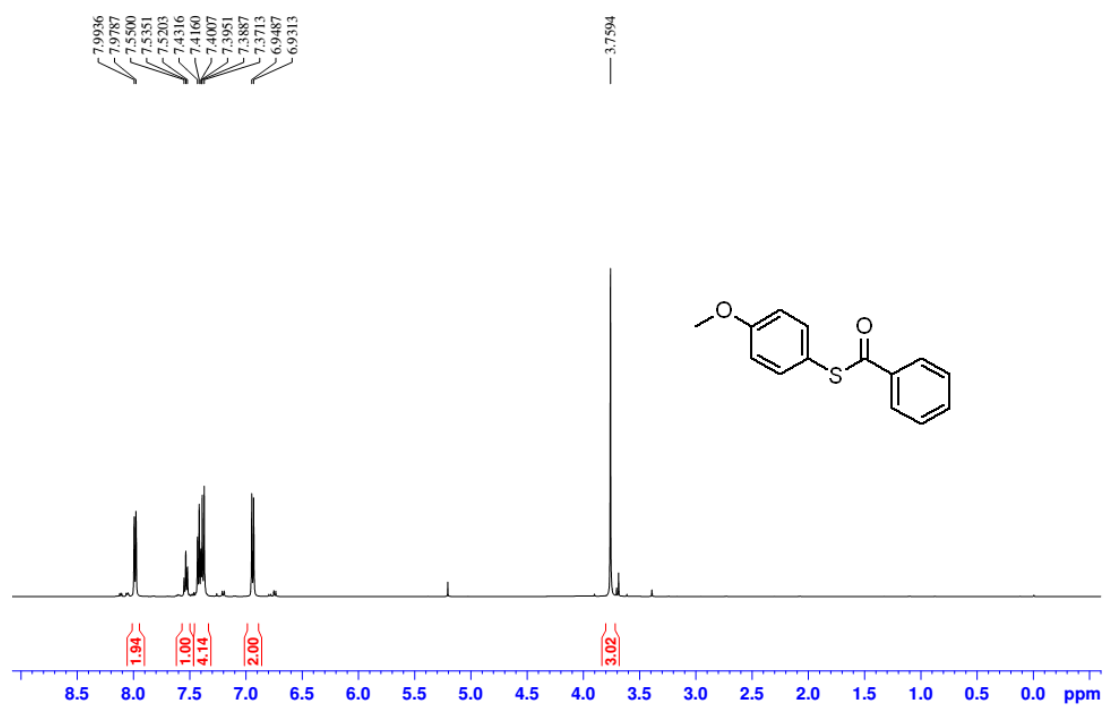

<sup>1</sup>H NMR spectrum (500 MHz, CDCl<sub>3</sub>) of **31**

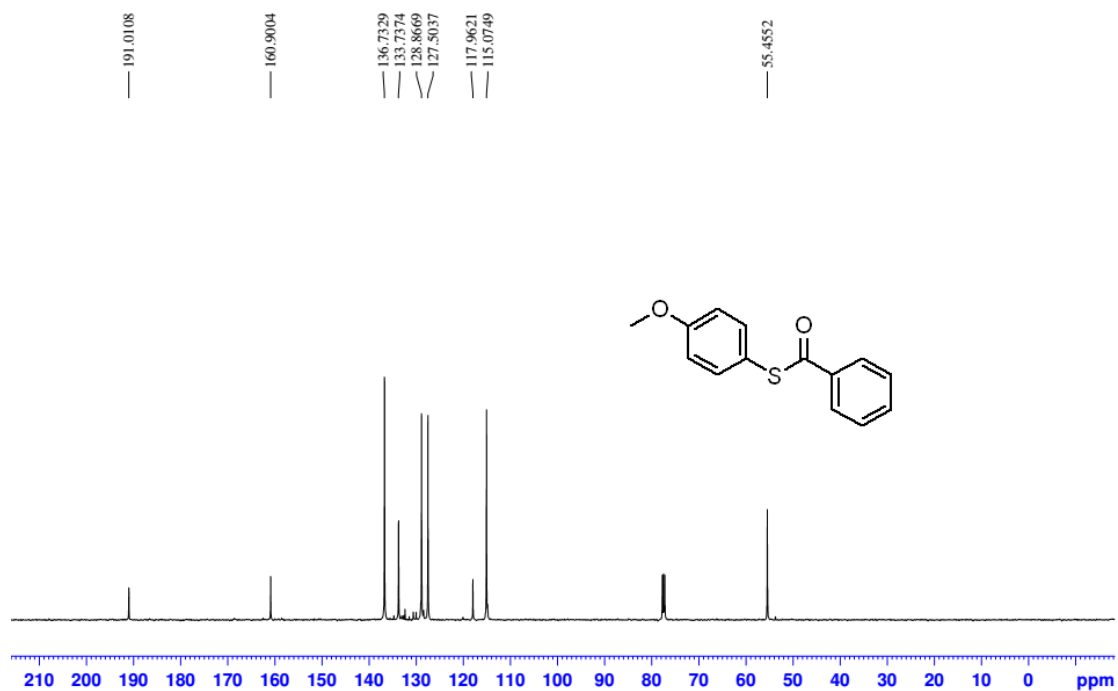

<sup>13</sup>C NMR spectrum (125 MHz, CDCl<sub>3</sub>) of **31**

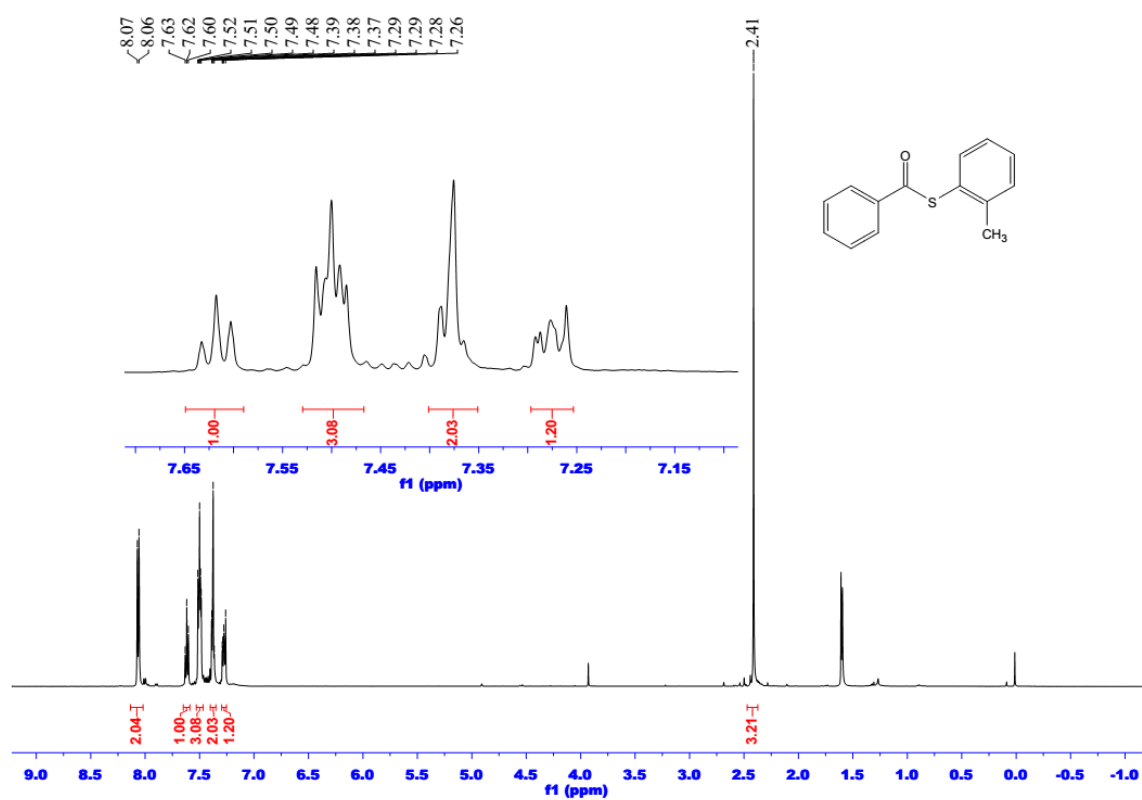

<sup>1</sup>H NMR spectrum (500 MHz, CDCl<sub>3</sub>) of **3m**

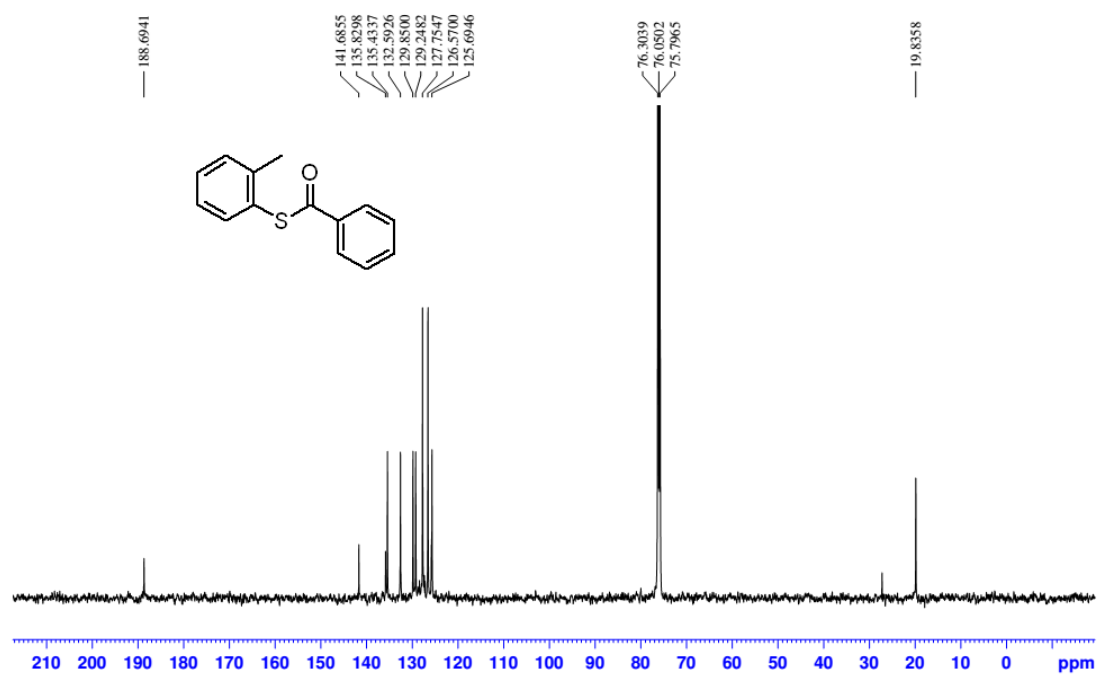

<sup>13</sup>C NMR spectrum (125 MHz, CDCl<sub>3</sub>) of **3m**

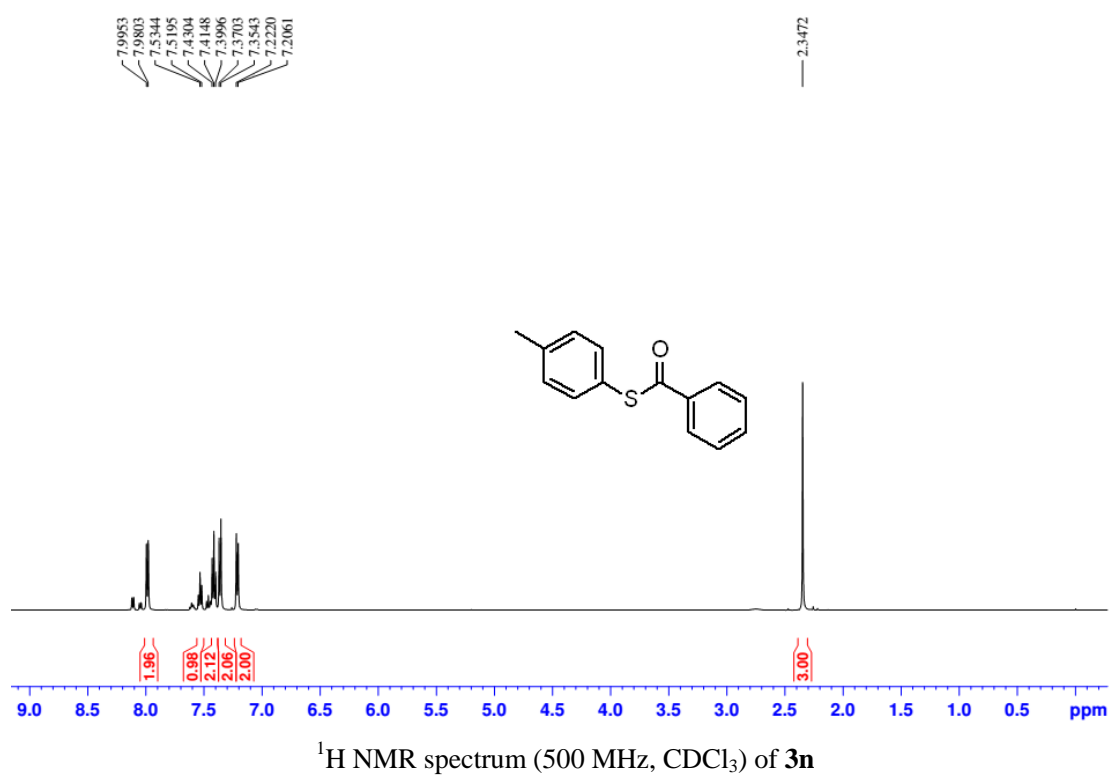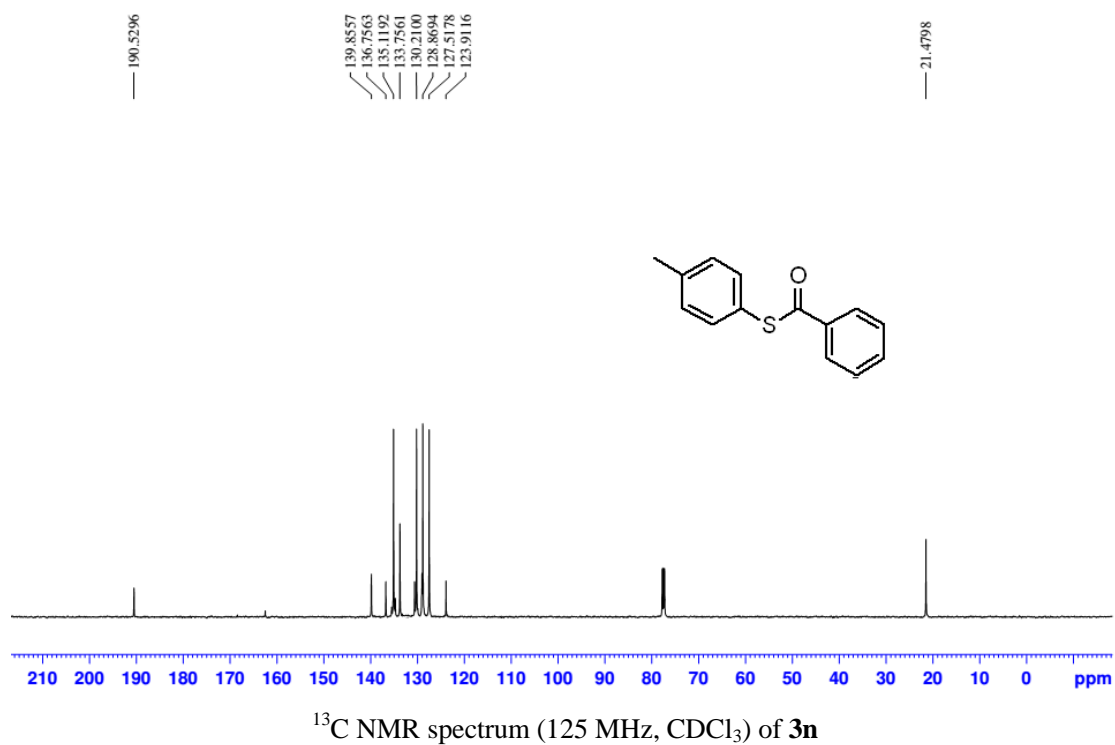

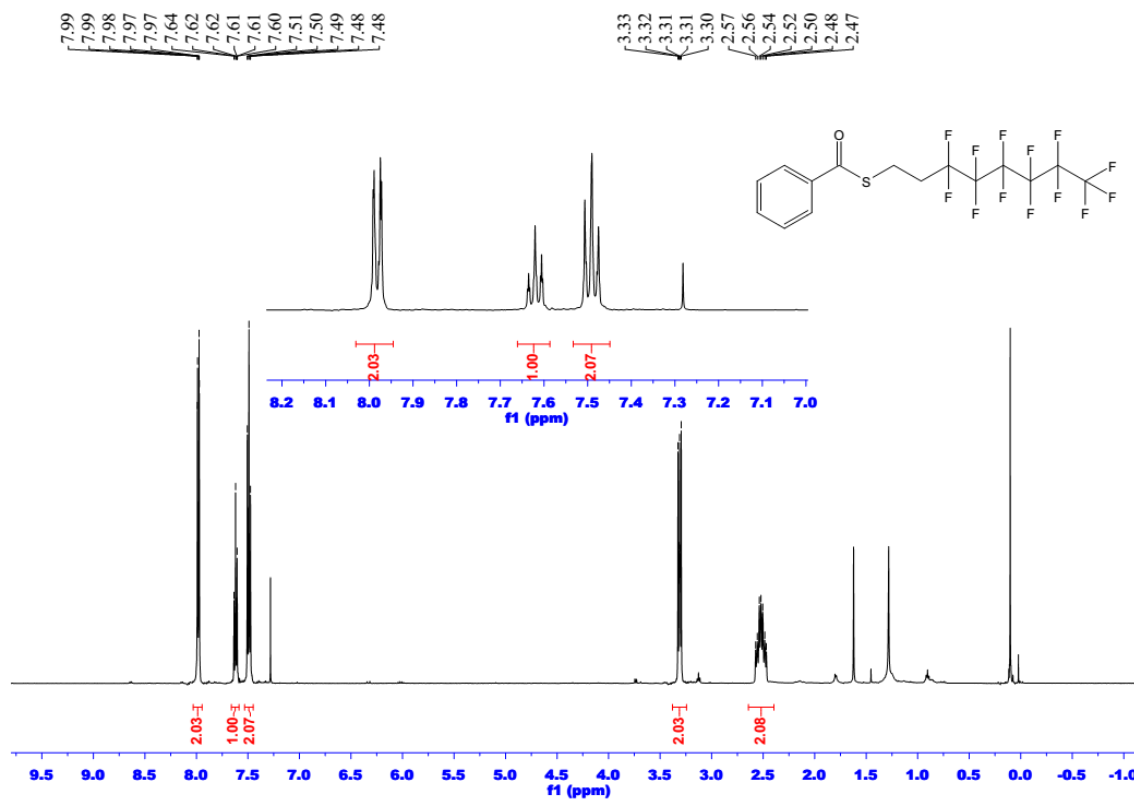

<sup>1</sup>H NMR spectrum (500 MHz, CDCl<sub>3</sub>) of **3o**

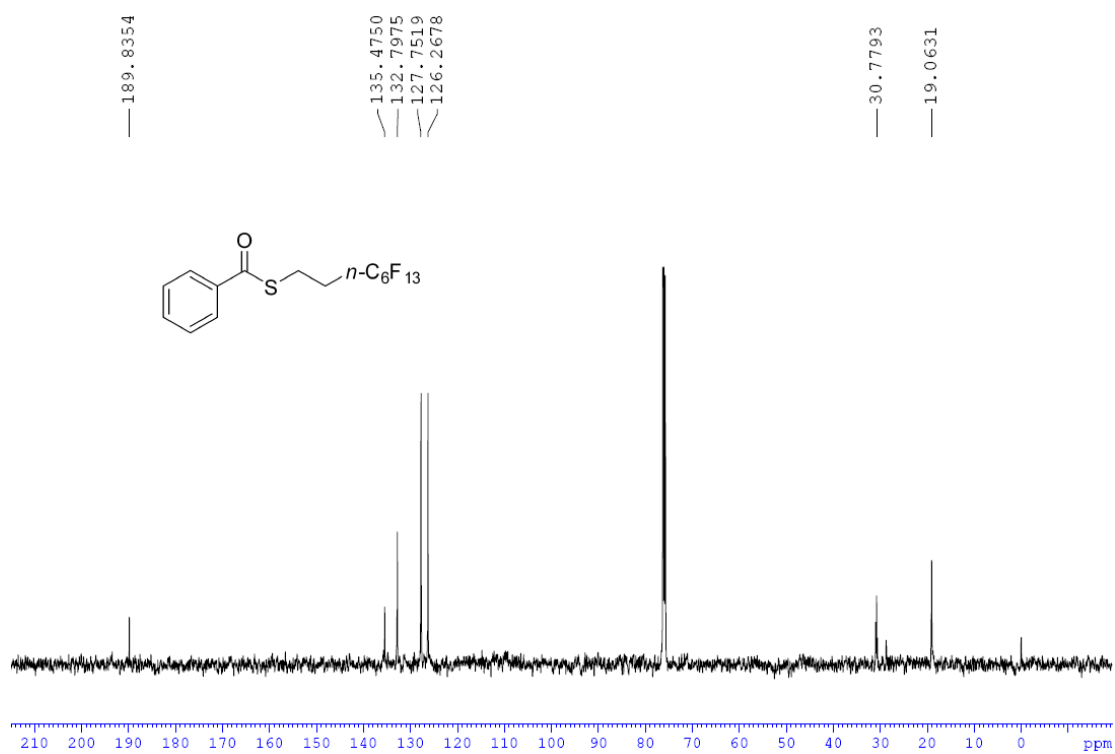

<sup>13</sup>C NMR spectrum (125 MHz, CDCl<sub>3</sub>) of **3o**





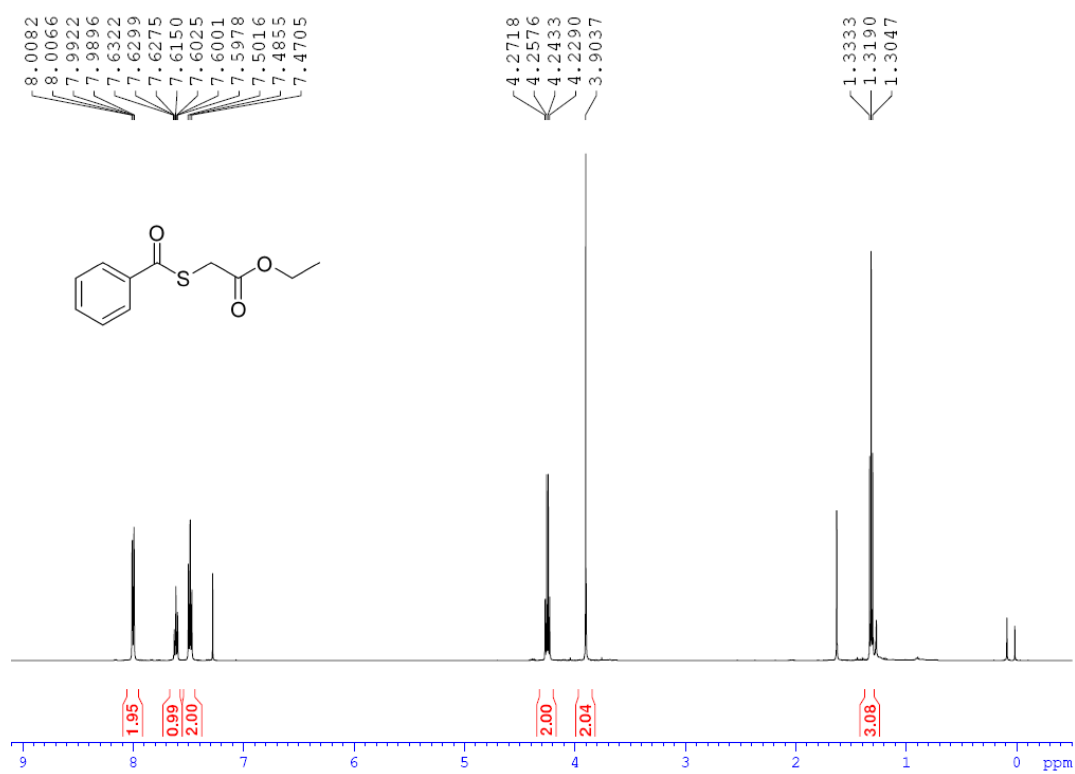

<sup>1</sup>H NMR spectrum (500 MHz, CDCl<sub>3</sub>) of **3p**

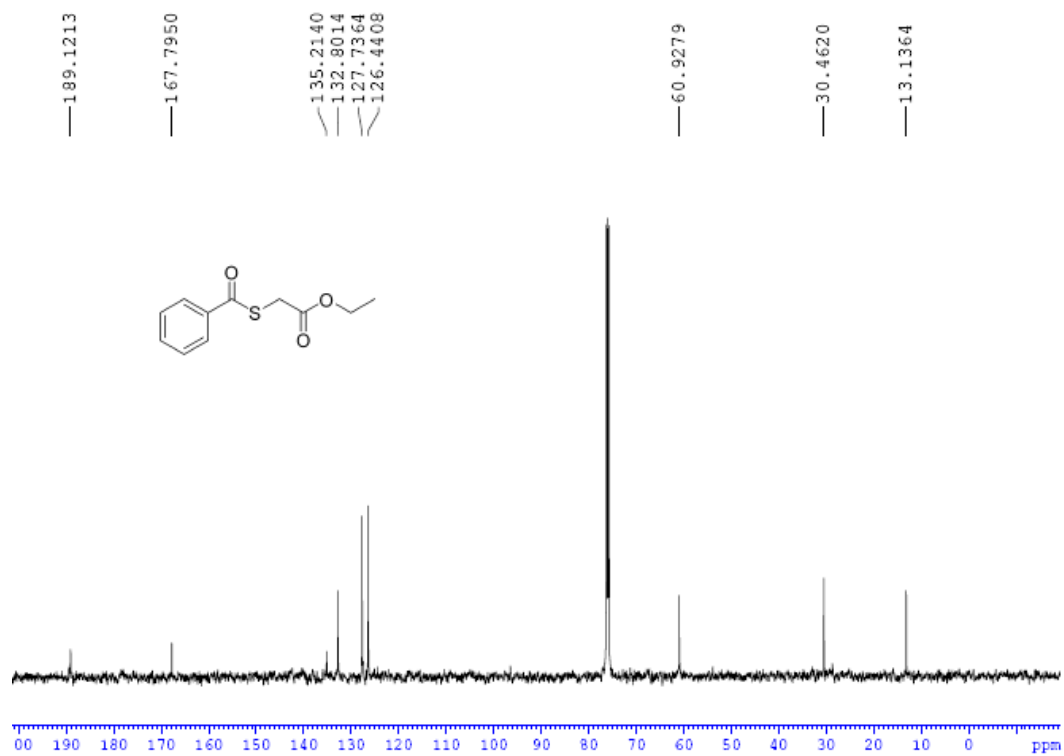

<sup>13</sup>C NMR spectrum (125 MHz, CDCl<sub>3</sub>) of **3p**

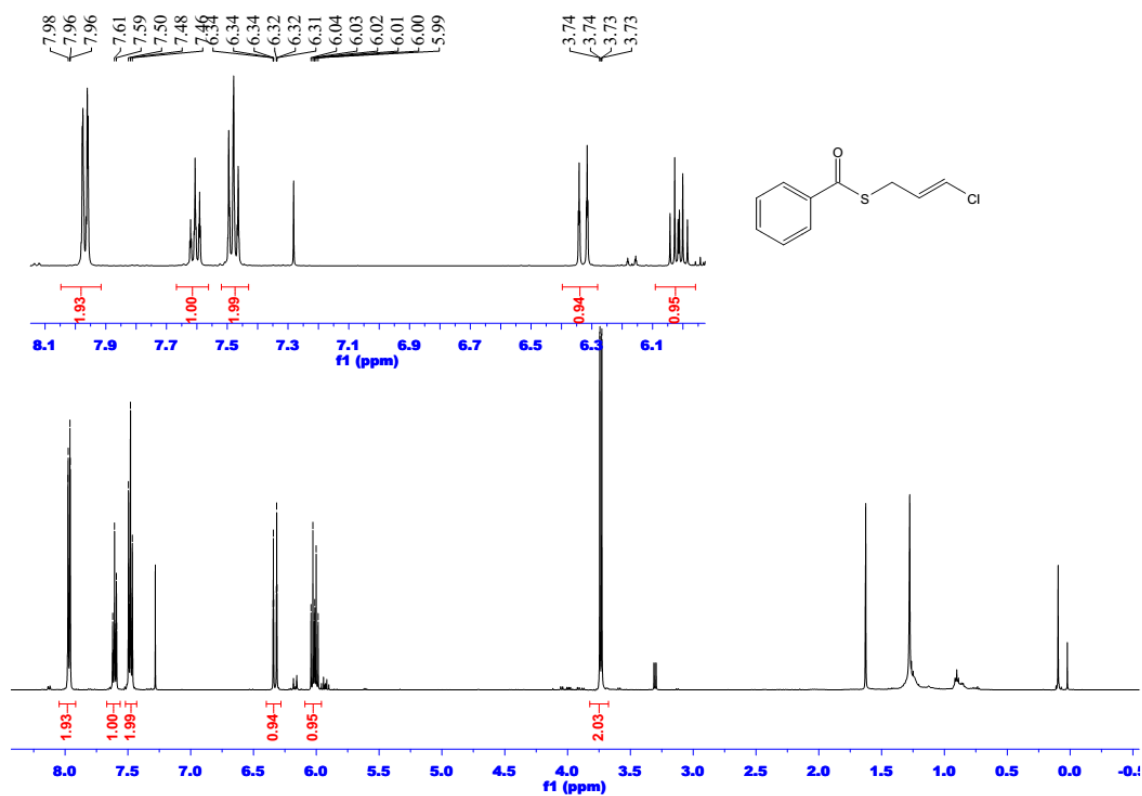

<sup>1</sup>H NMR spectrum (500 MHz, CDCl<sub>3</sub>) of **3q**

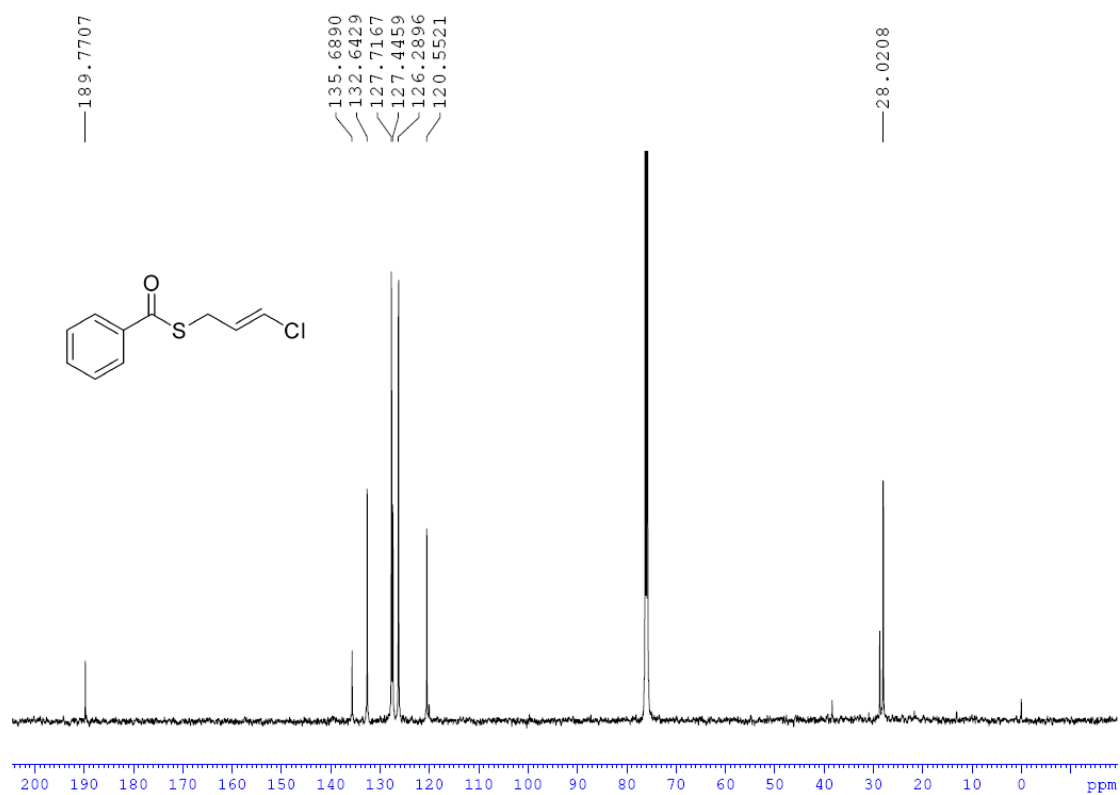

<sup>13</sup>C NMR spectrum (125 MHz, CDCl<sub>3</sub>) of **3q**

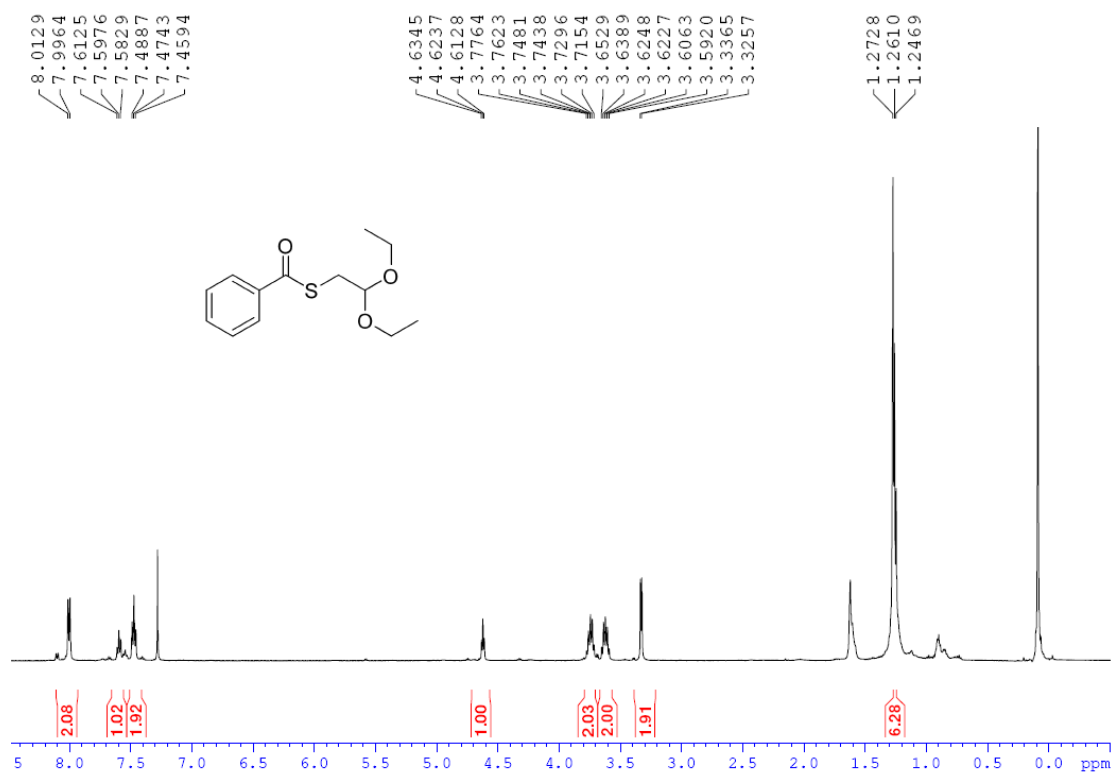

<sup>1</sup>H NMR spectrum (500 MHz, CDCl<sub>3</sub>) of **3r**

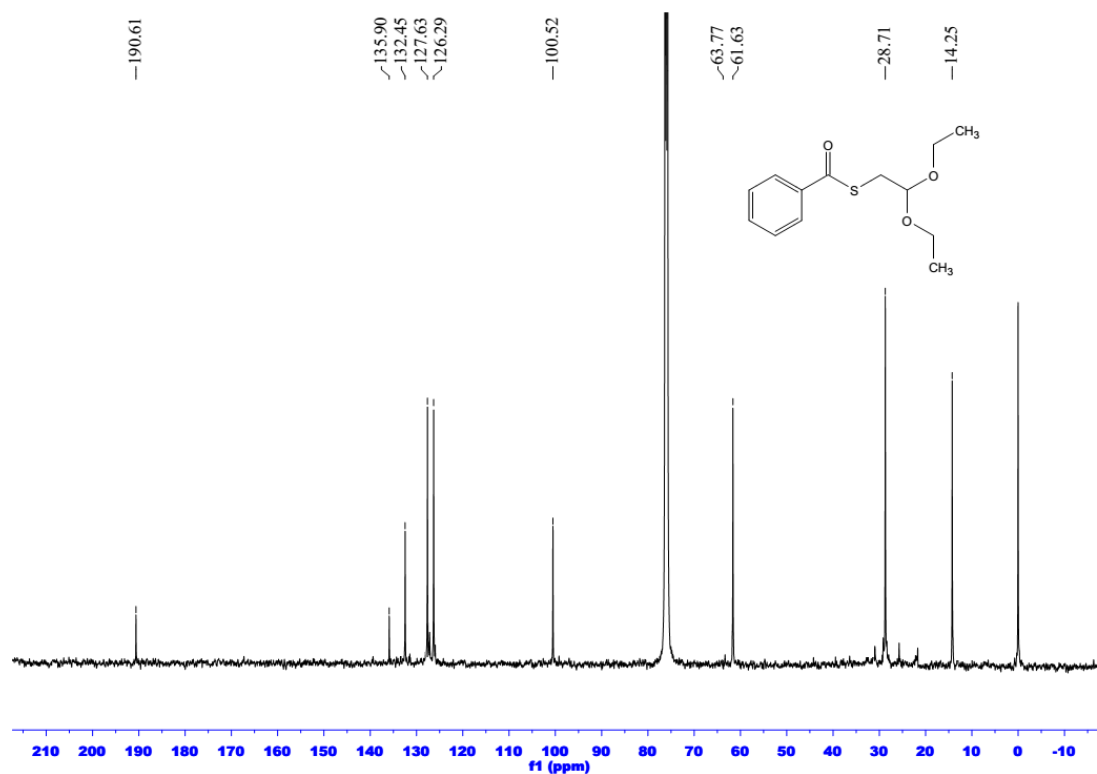

<sup>13</sup>C NMR spectrum (125 MHz, CDCl<sub>3</sub>) of **3r**

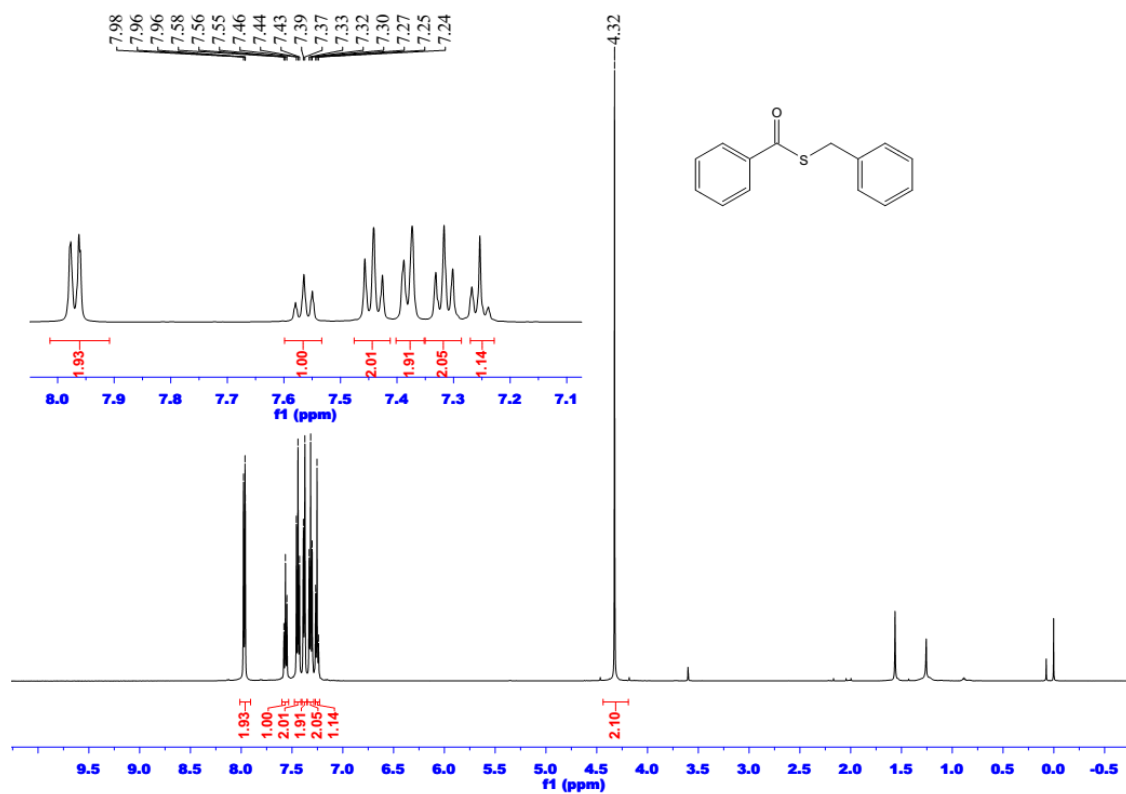

<sup>1</sup>H NMR spectrum (500 MHz, CDCl<sub>3</sub>) of **3s**

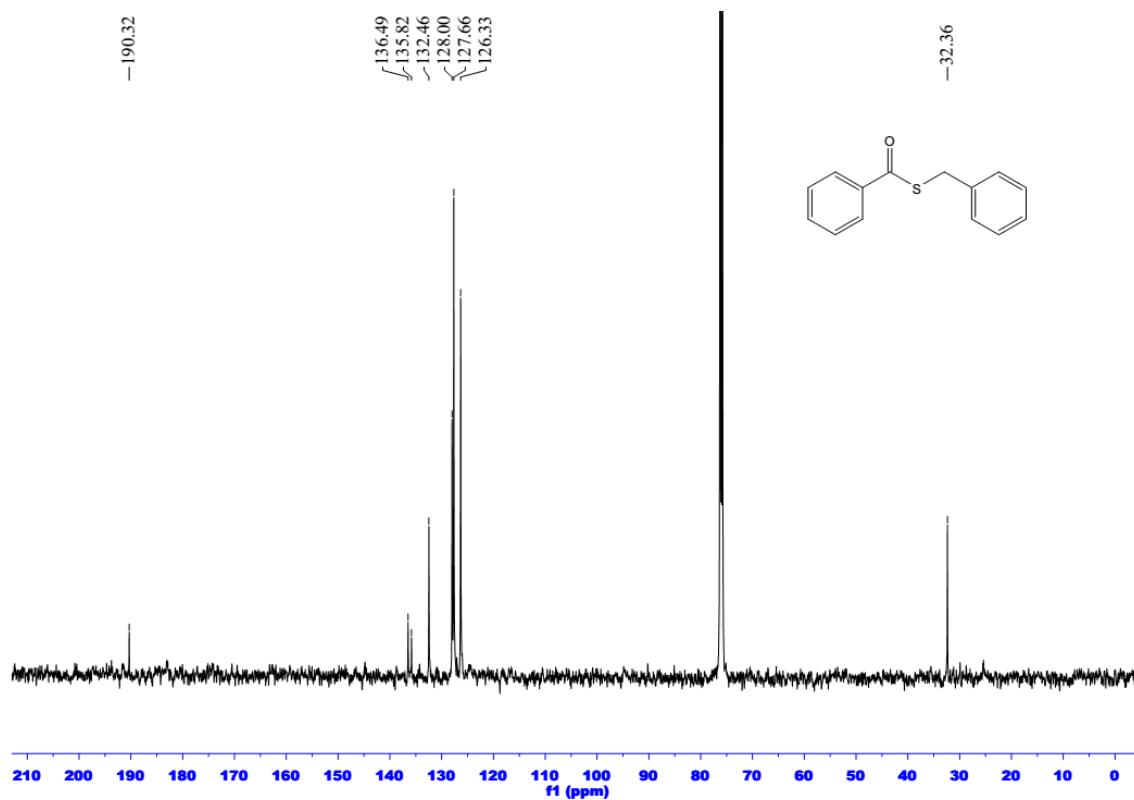

<sup>13</sup>C NMR spectrum (1)

25 MHz, CDCl<sub>3</sub>) of **3s**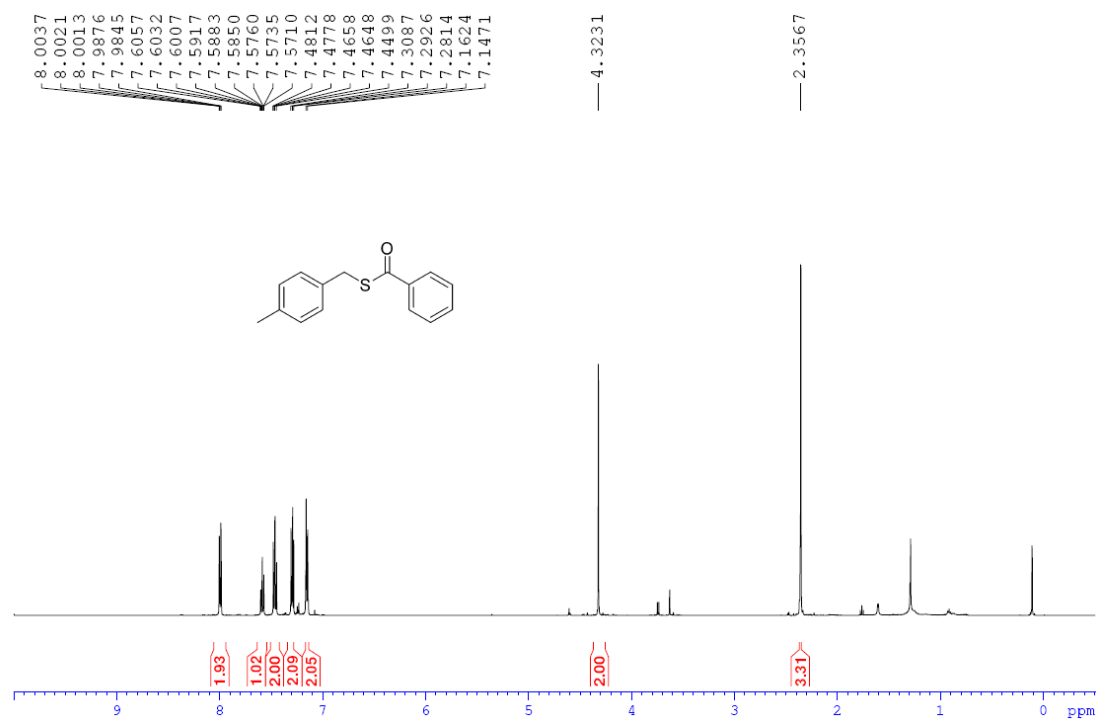<sup>1</sup>H NMR spectrum (500 MHz, CDCl<sub>3</sub>) of **3t**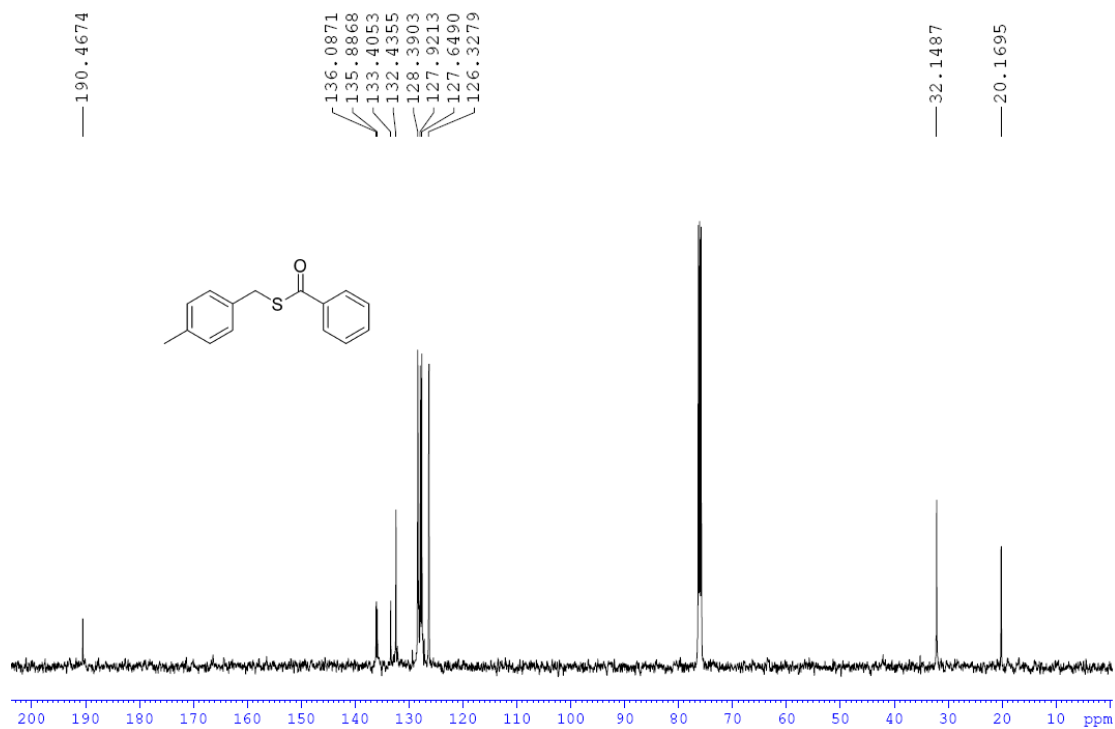<sup>13</sup>C NMR (125 MHz, CDCl<sub>3</sub>) spectrum of **3t**

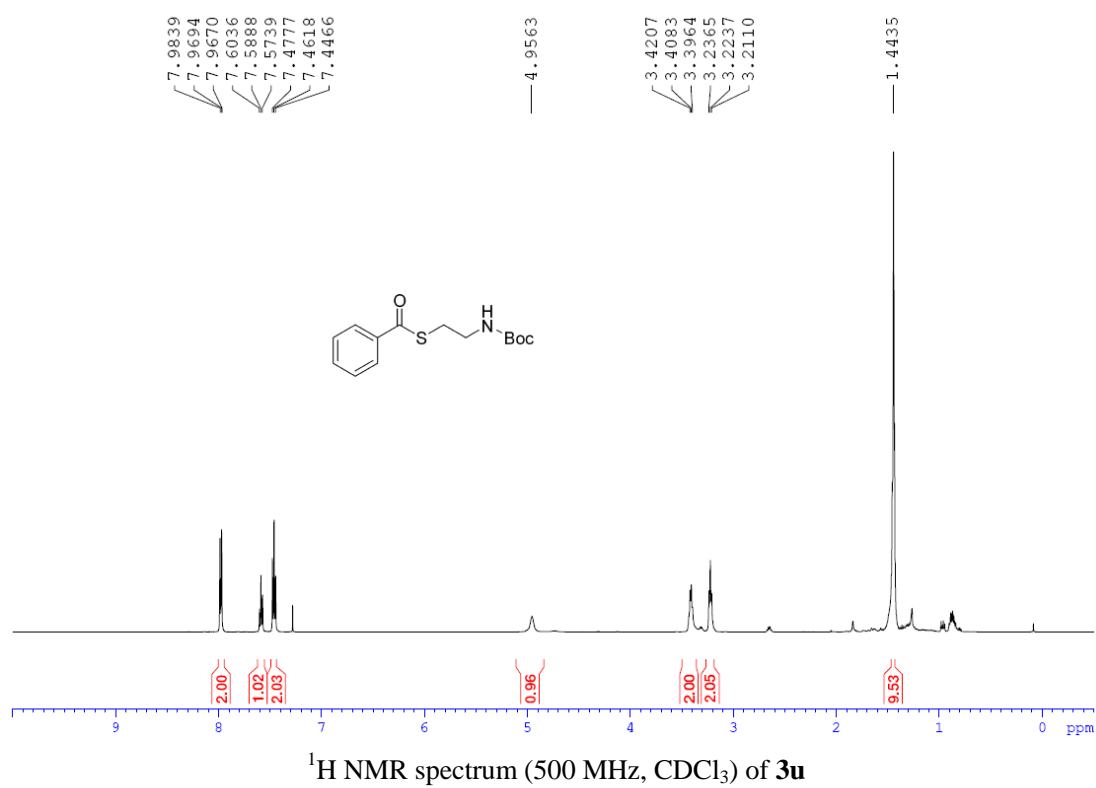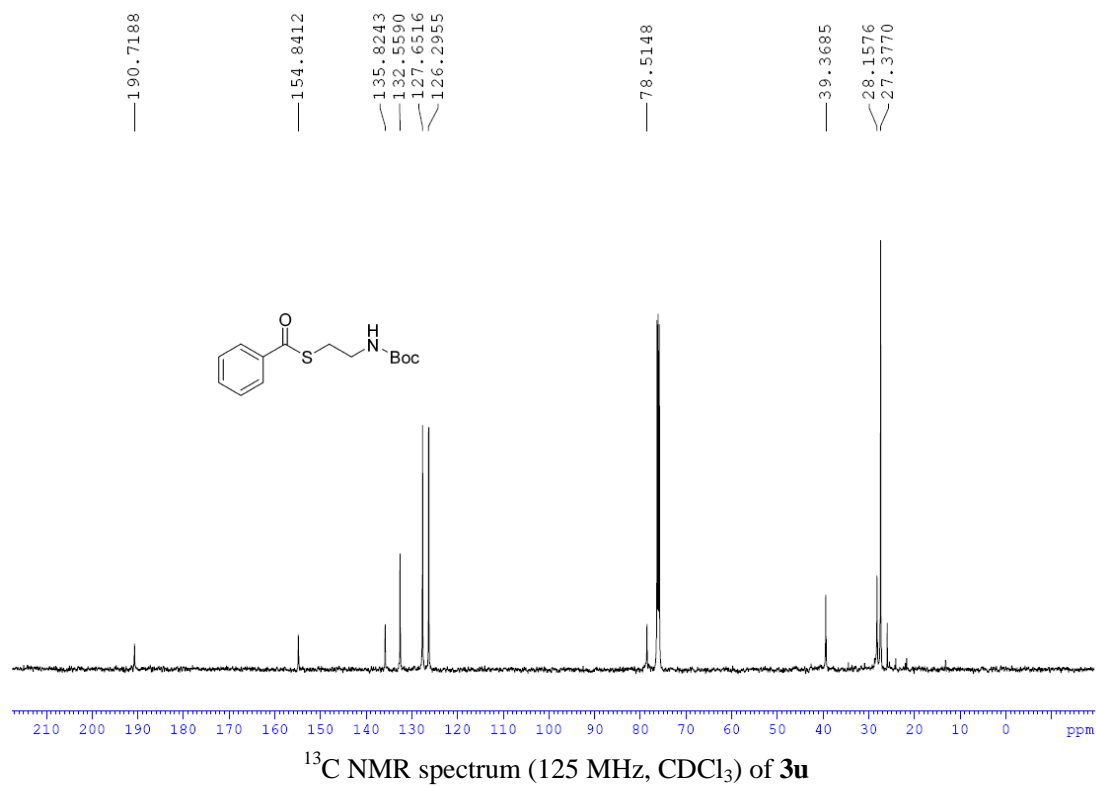

Supplement: c4ob02250e1.pdf [file c4ob02250e1.pdf]
